1 **Mitochondrial ribosomal proteins developed unconventional mitochondrial targeting**  
2 **signals due to structural constraints**

3

4 Yury S. Bykov<sup>1,\*</sup>, Tamara Flohr<sup>2,\*</sup>, Felix Boos<sup>2,3</sup>, Johannes M. Herrmann<sup>2,§</sup>, Maya Schuldiner<sup>1,§</sup>

5

6 1. Department of Molecular Genetics, Weizmann Institute of Science, Rehovot, Israel

7 2. Division of Cell Biology, University of Kaiserslautern, Germany

8 3. Current address: Department of Genetics, Stanford University, Stanford, CA

9

10

11 \* Equal contribution

12 § Correspondence to: [maya.schuldiner@weizmann.ac.il](mailto:maya.schuldiner@weizmann.ac.il), [hannes.herrmann@biologie.uni-kl.de](mailto:hannes.herrmann@biologie.uni-kl.de)

13

14 Keywords: mitochondria, targeting, translocation, mitochondrial ribosome, mitochondrial  
15 targeting signal, ribosome structure

16

17

18 **Abstract**

19 Mitochondrial ribosomes are complex molecular machines indispensable for respiration.  
20 Their assembly involves the import of several dozens of mitochondrial ribosomal proteins  
21 (MRPs), encoded in the nuclear genome, into the mitochondrial matrix. Available proteomic  
22 and structural data as well as computational predictions indicate that up to 25% of MRPs do  
23 not have a conventional N-terminal mitochondrial targeting signal (MTS). We characterized a  
24 set of 15 yeast MRPs *in vivo* and showed that 30% of them use internal mitochondrial  
25 targeting signals. We isolated a novel internal targeting signal from the conserved MRP  
26 Mrp17 (bS6). The Mrp17 targeting signal shares some properties as well as import  
27 components with conventional MTS-containing proteins but is not reliably predicted  
28 indicating that mitochondrial protein targeting is more versatile than expected. We  
29 hypothesize that internal targeting signals arose in MRPs when the N-terminus extension  
30 was constrained by ribosome assembly interfaces.

31

## 32 Introduction

33 Mitochondria are descendants of ancient bacteria that formed eukaryotic cells together with  
34 their archaeal host (Martijn et al., 2018; Sagan, 1967; Zaremba-Niedzwiedzka et al., 2017).  
35 Since then, mitochondria have lost their autonomy and their reproduction depends entirely  
36 on the nuclear genome, which encodes the majority of mitochondrial proteins. However all  
37 mitochondria capable of respiration have retained small vestigial genomes of their own and  
38 fully functional gene expression machineries of bacterial origin (Roger et al., 2017).

39 Mitochondrial ribosomes (mitoribosomes) are the most complex components of the  
40 mitochondrial gene expression system and consist of several RNA molecules and 60 to 80  
41 different proteins (Greber and Ban, 2016; Ott et al., 2016). Mitoribosome dysfunction has  
42 adverse consequences leading to a broad spectrum of diseases (Boczonadi and Horvath,  
43 2014).

44 While it took many years to solve the first ribosome structures (Ban et al., 2000; Carter et al.,  
45 2000; Schluenzen et al., 2000), rapid progress in cryo-electron microscopy is now rapidly  
46 revealing the structural details of mitoribosomes of many different organismic groups  
47 (Amunts et al., 2015; Desai et al., 2017; Itoh et al., 2020; Kummer et al., 2018; Ramrath et  
48 al., 2018; Tobiasson and Amunts, 2020; Waltz et al., 2020). The availability of so many  
49 structures highlighted an interesting feature of mitoribosomes - their incredible evolutionary  
50 diversity (Kummer and Ban, 2021; Waltz and Giegé, 2019). The composition of  
51 mitochondrial ribosomes in different eukaryotic lineages underwent dramatic changes  
52 caused by multiple losses of RNA segments and mitoribosomal proteins (MRPs) as well as  
53 acquisition of new, lineage-specific RNA segments and MRPs (Desmond et al., 2011; Petrov  
54 et al., 2019; Sluis et al., 2015; Smits et al., 2007). As a result, mitoribosomes contain a core  
55 set of MRPs homologous to the bacterial ribosomal proteins (BRPs) and a variable set of  
56 MRPs that can be common for all mitochondrial ribosomes or specific only to certain  
57 eukaryotic lineages. In addition, during their evolution many MRPs acquired significant  
58 expansions of their C- and N-termini while retaining structurally conserved domains of their  
59 BRP ancestors (Melnikov et al., 2018; Sluis et al., 2015; Vishwanath et al., 2004).

60 Mitochondrial genomes in many eukaryotic cells (with the exception of animals) still contain  
61 genes for a number of ribosomal proteins, indicating that their successful transfer to the  
62 nuclear genome might be less easily feasible than that of many other matrix proteins  
63 (Bertgen et al., 2020). However, most, in animals even all, MRPs are nuclear encoded.  
64 Thus, similarly to the majority of mitochondrial proteins (numbering from around 800 in yeast  
65 to around 1500 in mammals), they must be imported from the cytosol (Morgenstern et al.,  
66 2017; Pagliarini et al., 2008; Vögtle et al., 2017).

67 The import of mitochondrial proteins can be conceptually subdivided in two steps: (1)  
68 targeting of the newly synthesized mitochondrial protein precursors to the mitochondrial  
69 membrane. This can occur either post-translationally or co-translationally involving  
70 ribosome-nascent chain complexes. (2) Translocation of the unfolded precursors through the  
71 mitochondrial membrane(s) to deliver them to their final destination within mitochondria  
72 (Bykov et al., 2020). Effective targeting and translocation are mediated by specialized  
73 protein complexes that recognize targeting and translocation signals within precursor protein  
74 sequences.

75 Most matrix and inner membrane proteins are synthesized with N-terminal matrix targeting  
76 sequences (MTSs), also called presequences, which are both necessary and sufficient for  
77 mitochondrial targeting. MTSs have a characteristic structure that can be predicted by  
78 prediction algorithms (Armenteros et al., 2019; Claros and Vincens, 1996; Emanuelsson et  
79 al., 2000; Fukasawa et al., 2015). MTSs are typically between 10 and 60 residues in length  
80 and can form an amphipathic  $\alpha$ -helix with one positively charged surface and one  
81 hydrophobic surface. In most cases MTSs are proteolytically removed during protein import,  
82 giving rise to mature forms of mitochondrial matrix or inner-membrane proteins (Bedwell et  
83 al., 1989; Vögtle et al., 2009; von Heijne, 1986).

84 In contrast to basically all other proteins of the mitochondrial matrix, many MRPs lack N-  
85 terminal MTSs (Woellhaf et al., 2014). In some cases, MRPs use N-terminal regions that  
86 mimic the properties of MTSs but are not cleaved (un-cleaved MTSs). Such un-cleaved  
87 MTSs are also found in some matrix proteins that are not associated with the ribosome,  
88 such as Hsp10 (Poveda-Huertes et al., 2020). Surprisingly, a number of MRPs do not  
89 contain any regions that show MTS-like features and it is unknown how mitochondria  
90 recognize and import these proteins. For now, there are only two well characterized  
91 examples of MRPs with unconventional MTSs – Mrp132 (bL32, by new nomenclature (Ban et  
92 al., 2014)) and Mrp10 (mS37) whose import path deviates from the canonical matrix-  
93 targeting route (Bonn et al., 2011; Longen et al., 2014; Nolden et al., 2005).

94 In this study, we studied the mechanisms by which MRPs are imported and assembled into  
95 the mitoribosome. We systematically examined N-termini of unconventional MRPs and  
96 analyzed them *in silico* and experimentally. We further focused on the biogenesis of Mrp17  
97 (bS6) as a representative of the unconventional group of MTS-less MRPs. We discovered a  
98 novel mitochondrial matrix targeting region that is displayed in the internal sequence of the  
99 protein. This stretch shares properties with mitochondrial targeting sequences such as  
100 positive charges for receptor binding and membrane potential-dependent translocation, but  
101 differs in its structural features and position in the protein. The efficient import of Mrp17  
102 shows that the mitochondrial import machinery is much more versatile in its substrate

103 spectrum than expected. More generally, our work shows how structural restrictions forced  
104 the generation of unconventional targeting motifs.

105

## 106 **Results**

### 107 *Mapping unconventional MRP targeting signals*

108 To systematically investigate MRP targeting signals in detail, we compiled all existing data  
109 on the maturation of their N-termini in yeast (Table S1). We used direct N-terminal  
110 sequencing data (Boguta et al., 1992; Dang and Ellis, 1990; Davis et al., 1992; Graack et al.,  
111 1988; Graack et al., 1991; Grohmann et al., 1989; Grohmann et al., 1991; Kitakawa et al.,  
112 1990; Kitakawa et al., 1997; Matsushita and Isono, 1993; Matsushita et al., 1989), N-  
113 terminal proteomics (Vögtle et al., 2009) and predictions performed by UniProt annotators,  
114 as well as by ourselves using MitoFates for cleavage site prediction (Fukasawa et al., 2015).  
115 Importantly, we also used available structural information (Desai et al., 2017). In particular,  
116 mitoribosome structures were helpful to identify proteins that do not have a cleavable MTS –  
117 such proteins had their N-termini contained within the structure and hence could not have  
118 been cleaved after import into the mitochondrial matrix. We reanalyzed ribosome profiling  
119 data on translation initiation in yeast (see Methods for details) to ascertain that none of these  
120 proteins has mis-annotated translation start sites that might produce an N-terminal extension  
121 accounting for a missing cleavable MTS (Fig. S1). In the yeast mitochondrial ribosome  
122 structure (PDB:5MRC), the structures of six proteins started with amino acid number 1 (Met),  
123 structures of 12 started with amino acid number 2, five – with amino acids 3 to 9, and the  
124 rest, 50, with amino acid number 10 and more. The number of the first amino acid present in  
125 the structure was moderately conserved among the determined mitoribosome structures  
126 (Fig. S2) and was not restricted to any particular group of MRPs classified by origin  
127 (bacterial, mitochondria-specific, or yeast-specific) or position in the structure (Fig. S3).

128 Interestingly, a simple distinction by the first amino acid appearing in the structure separates  
129 MRPs into two classes. In the first group are those MRPs that are derived from cleaved  
130 precursors (which consistently have high MTS prediction scores). In addition, this group may  
131 contain proteins with an uncleavable N-terminus of a flexible nature which would then be  
132 unresolved in the available structures. Some of the latter may have poor mitochondrial  
133 targeting scores in prediction algorithms. In the second group are those whose structure  
134 starts with amino acid number less than 10. Most of these proteins score very poorly with  
135 different software predicting N-terminal MTS (Fig. 1A, Fig. S2). Many MRPs of this group  
136 lack conventional, N-terminal import signals, and their targeting signals are not predictable  
137 by available software. Thus, the available structures of mitochondrial ribosomes confirm the

138 previous conclusion that many MRPs are made without N-terminal MTSs (Woellhaf et al.,  
139 2014).

140 Next, we experimentally analyzed the targeting information in the sequences of different  
141 MRPs by GFP fusion proteins. To this end, we selected 15 MRPs with different properties  
142 (Fig. S3, Table S2). Then we tested whether the N-terminal 30 residues of these proteins  
143 were necessary and/or sufficient for mitochondrial targeting. The length of 30 residues was  
144 chosen as it corresponds to the most common size of a cleavable yeast MTS (Vögtle et al.,  
145 2009). To test this, we expressed each MRP in diploid yeast fused to GFP. To assay if the  
146 N-terminus is necessary we expressed a truncated version with the first 30 amino acids  
147 deleted (MRP<sub>Δ30</sub>-GFP). To test if the N-terminus is sufficient we expressed a version with  
148 only the first 30 amino acids (MRP<sub>1-30</sub>-GFP). As a control we used the full-length version  
149 (MRP<sub>Full</sub>-GFP) (Fig. 1B). The distribution of GFP signals was imaged in cells in which  
150 mitochondria were stained with MitoTracker Orange (Fig. 1C-E, Fig S4, Table S2). Six  
151 proteins (Mrp15, Rsm26, Rsm18, Rsm25, Mrp40, and Rsm27) contained targeting  
152 information within their N-termini (Fig. 1C); of them, only Mrp15 (mL57) had high MTS  
153 prediction scores consistent with highly confident annotation of a cleavable 29-amino acid  
154 long MTS (Table S1). Other proteins whose N-termini were able to target GFP to  
155 mitochondria had low MTS prediction scores (Table S2) indicating that their N-terminal  
156 signals have distinct properties, not similar to conventional MTSs. For four proteins (Mrps16,  
157 Mrp51, Mrp138, and Mrp128) neither the N-terminal 30 residues nor the internal segment on  
158 its own were sufficient for targeting, indicating that the necessary targeting information is  
159 contained in an N-terminal segment longer than 30 amino acids or distributed over the whole  
160 length of these proteins (Fig. 1D). Finally, five proteins (Mrp17, Pet123, Mrp123, Mrp35, and  
161 Mrp20) were targeted to mitochondria independently of their N-terminal regions indicating  
162 that the targeting signals in these proteins are internal (Fig. 1E).

163 Interestingly, many of the N-terminally truncated MRP versions accumulated outside of the  
164 mitochondria in the cytosol or, in many cases, in the nucleus (Fig. 1C-E, Fig. S4B). These  
165 observations agree with the recent discovery that mistargeted mitochondrial proteins can  
166 accumulate in the nucleus and get degraded in perinuclear puncta (Shakya et al., 2021).  
167 Despite the mislocalization of several of these forms, none of them resulted in obvious  
168 growth defects (Fig. S5).

169 To summarize, we selected a subset of MRPs with diverse structural and sequence features  
170 and characterized the mitochondrial targeting capacity of their N termini. We observed that  
171 many of these MRPs contain multiple unconventional targeting signals, often outside of the  
172 30 N-terminal residues, thus apparently scattered over their sequence. One particularly  
173 intriguing MRP was Mrp17 (bS6), a protein of the small subunit of the yeast mitoribosome.

174 Mrp17 lacks any identifiable targeting signal while being one of the most structurally  
175 conserved proteins across all mitoribosomal structures studied to date. Hence, we chose  
176 Mrp17 for further investigation.

177

### 178 *Defining Mrp17 targeting and translocation signals*

179 To investigate the unconventional mitochondrial targeting signals of Mrp17 in more detail we  
180 created a systematic set of Mrp17 truncations fused to GFP and expressed them in diploid  
181 yeast (Fig. S6). We observed that the internal fragment of Mrp17 between amino acids 20  
182 and 100 was the minimal fragment able to target GFP to mitochondria similarly to full-length  
183 Mrp17 (131 amino acids) without producing cytosolic background signal (Fig. 2A). This  
184 indicates that similarly to the N-terminus, the C-terminus is dispensable for targeting.  
185 Splitting this fragment in two halves showed that the N-terminal part (Mrp17<sub>21-60</sub>) was still  
186 able to target GFP to mitochondria although with significant cytosolic background while the  
187 C-terminal part (Mrp17<sub>61-100</sub>) was cytosolic (Fig. 2A). We conclude that, *in vivo*, Mrp17 region  
188 21-60 is necessary for mitochondrial targeting but is not sufficient for efficient targeting,  
189 which is promoted by additional signals distributed over the whole length of the protein (Fig.  
190 S7A,B).

191 The microscopic analysis does not allow us to discriminate between targeting to the  
192 mitochondrial surface from complete translocation into the matrix. To elucidate the import  
193 efficiency of different Mrp17 regions we used *in vitro* translocation assays into isolated yeast  
194 mitochondria. Since Mrp17 is very small and many fragments lacked methionine residues  
195 that are necessary for radiolabeling, we fused Mrp17 to an unfolded mutant of the mouse  
196 dihydrofolate reductase - DHFR<sub>mut</sub> (Vestweber and Schatz, 1988). The full-length Mrp17-  
197 DHFR<sub>mut</sub> fusion was effectively imported into isolated yeast mitochondria at the same rate as  
198 untagged Mrp17 but gave much stronger signals in autoradiography (Fig. 2B, Fig. S7C). In  
199 agreement with the targeting experiments performed *in vivo*, the short N-terminal region of  
200 Mrp17 was neither necessary nor sufficient for efficient translocation (Mrp17<sub>21-131</sub>, Mrp17<sub>1-20</sub>  
201 in Fig. 2B). The first 60 amino acids of Mrp17 were sufficient for translocation narrowing  
202 down the import signal to the N-terminal half of the protein (Mrp17<sub>1-60</sub> in Fig. 2B). Leaving  
203 only the first 40 amino acids or removing them from the N-terminus reduced the  
204 translocation speed indicating that regions 20-40 and 40-60 are equally important parts of  
205 the signal (Mrp17<sub>1-40</sub> and Mrp17<sub>41-131</sub> in Fig. 2B). Finally, we narrowed down the Mrp17  
206 region containing the translocation signal to amino acids 30-60 (Fig. 2B, bottom; Fig. S7D).  
207 However, similarly to the results of *in vivo* experiments, even short fragments of Mrp17  
208 outside this region retained some translocation capacity (Fig. 2B, Fig. S7C).

209 To summarize, we determined that the main mitochondrial targeting and translocation signal  
210 of Mrp17 is positioned between amino acids 30 to 60. However, there exist additional signals  
211 that improve mitochondrial targeting efficiency or stability *in vivo*. These additional signals  
212 reside in the C-terminal half of Mrp17. This again indicates, that the mitochondrial targeting  
213 regions are scattered over the Mrp17 sequence, and for this protein, the N-terminal region is  
214 irrelevant for efficient mitochondrial import.

215

### 216 *Characterizing the features of the Mrp17 targeting and translocation signal*

217 Next, we analyzed the unconventional internal targeting region of Mrp17 located between  
218 residues 30-60 in more detail. Standard prediction algorithms do not find an MTS-like  
219 sequence in this region (Fig. S3). The Mrp17 structure mostly contains beta-strands in this  
220 region and only a part of a helical stretch (Fig. 3A). Mrp17 is generally rich in positive  
221 charges (its pI is 10.5) and a high content of positive charges are a general feature of  
222 ribosomal proteins that interact with negatively charged mRNA. Interestingly, during  
223 evolution, the positive charges in MRPs (and particularly their lysine content) was further  
224 increased suggesting that positive charges might play a role beyond their relevance for  
225 neutralizing the negative charges of ribosomal RNA (Fig. S8A, B).

226 To find out whether mitochondrial targeting and import require the positive charge and if so,  
227 whether there is a specific dependence on lysines, we constructed mutants of Mrp17 with all  
228 lysines substituted with arginines thus maintaining the charge (Mrp17<sub>K-R</sub>) or all lysines  
229 substituted for alanines thus decreasing the charge (Mrp17<sub>K-A</sub>). The Mrp17<sub>K-R</sub> mutant fused  
230 to DHFR<sub>mut</sub> was efficiently imported into isolated mitochondria, while the Mrp17<sub>K-A</sub> mutant  
231 was not (Fig. 3B). Similarly to the results obtained *in vitro*, Mrp17<sub>K-R</sub> fused to GFP and  
232 expressed in yeast colocalized with mitochondria as the wild type Mrp17 while Mrp17<sub>K-A</sub>-  
233 GFP remained cytosolic (Fig. 3C, Fig. S8C). Thus, the positive charge is an important  
234 feature of the Mrp17 translocation signal. We also constructed Mrp17 mutants with lysines  
235 substituted with alanines only in the 1-60 or 30-60 regions. These mutants fused to DHFR<sub>mut</sub>  
236 were also not imported indicating that the positive charges indeed must be positioned in the  
237 targeting signal region (Fig. 3D). Interestingly, Mrp17<sub>K-R</sub> was able to rescue the growth defect  
238 of  $\Delta mrp17$  cells on respiratory media suggesting that lysines per se are not essential for  
239 import and assembly of Mrp17, but the positive charges are (Fig. 3E).

240 Using mutagenesis, we determined that positive charge, most critically between amino-acids  
241 30-60, is important for the function of Mrp17 targeting and translocation signal.

242

243 *Determining the import pathway of Mrp17*

244 Since Mrp17 lacks the typical features and targeting signals of matrix proteins, we wondered  
245 how this protein was first recognized by mitochondria and later imported. To test the  
246 receptor requirement for the mitochondrial import of Mrp17, we treated isolated yeast  
247 mitochondria with trypsin that removes all the import receptors of the Translocase of the  
248 Outer Membrane (TOM) complex from the mitochondrial surface but spares membrane-  
249 embedded TOM subunits (Ohba and Schatz, 1987). Trypsin treatment strongly inhibits the  
250 import of MTS containing matrix proteins such as Atp1 (Fig. 4A) but does not affect the  
251 import of most intra-membrane space (IMS) proteins (Gornicka et al., 2014; Lutz et al.,  
252 2003). The import of Mrp17-DHFR<sub>mut</sub> was even more sensitive to trypsin treatment than the  
253 import of Atp1 (Fig. 4A). Thus, Mrp17 import into mitochondrial matrix strongly depends on  
254 the presence of the mitochondrial outer membrane receptors.

255 To determine the dependence of Mrp17 import on individual receptors we purified  
256 mitochondria from yeast lacking Tom20 ( $\Delta tom20$ ), the main receptor for recognition of  
257 canonical MTSs. Mrp17-DHFR<sub>mut</sub> import into  $\Delta tom20$  mitochondria was strongly reduced  
258 (Fig. 4B,C) indicating that Tom20 is involved in the import process. Deletion of Tom70 and  
259 its lowly expressed paralog Tom71 had no effect on the import of Mrp17-DHFR<sub>mut</sub> (Fig. S9),  
260 consistent with the absence of internal MTLs-like sequences (iMTS-Ls, (Backes et al.,  
261 2018)) in the protein (Fig. S3).

262 Since Tom20 deletion can affect the import of many mitochondrial proteins, its effect on  
263 Mrp17 can be indirect. However, we could find two potential motifs for binding Tom20  
264 ( $\Phi X X \Phi \Phi$ , where  $\Phi$  is hydrophobic amino acid and X – any amino acid; Fig. 3A)(Muto et al.,  
265 2001; Obita et al., 2003). To test whether the requirement for Tom20 binding is direct we  
266 mutated the Tom20-binding motifs in the Mrp17 translocation signal. For this, we  
267 constructed a mutant where each amino acid of both Tom20 binding motifs was substituted  
268 with alanine – Mrp17 $_{\Delta \Phi X X \Phi \Phi}$ . Indeed, the mutant fused to DHFR<sub>mut</sub> was not imported into  
269 isolated mitochondria supporting an essential role of these Tom20-binding motifs for import  
270 (Fig. 4D). However, the residual translocation of Mrp17-DHFR<sub>mut</sub> in  $\Delta tom20$  compared to  
271 trypsinized mitochondria suggests that Mrp17 can use additional receptors, albeit at lesser  
272 efficiency. Such a bypass receptor could potentially be Tom22 which was shown to work in  
273 concert with Tom20 in MTS recognition (Yamano et al., 2008).

274 Next, we used the temperature-sensitive mutants *tim17-ts* and *tim22-ts* that reduce the  
275 protein import along either of the two Translocase of the Inner Membrane (TIM) pathways –  
276 the TIM23 and TIM22 pathways, respectively. Mrp17 import into *tim17-ts* mitochondria was



277 reduced whereas its import into *tim22-ts* mitochondria was not affected showing that Mrp17  
278 uses the TIM23 pathway, similar to canonical MTS-containing proteins (Fig. 4E).

279 To summarize, Mrp17 has an internal targeting signal that shares some properties such as  
280 positive charge with a regular MTS. Indeed, its import pathway is similar to MTS containing  
281 proteins suggesting that mitochondrial components recognize it as a *bona fide* MTS yet even  
282 state-of-the-art prediction algorithms do not, suggesting that we lack information on certain  
283 MTS characteristics (Fig. 4F).

284

#### 285 *Comparison of Mrp17 to its bacterial homolog*

286 Unlike many other core MRPs that significantly extended their structures with insertions and  
287 N/C-terminal expansions, Mrp17 maintained the overall structure of its bacterial ancestors  
288 (Fig. 5A, Fig. S10). This means that in the course of evolution, the acquisition of an N-  
289 terminal MTS was either not possible so that the Mrp17 mitochondrial targeting signal had to  
290 be accommodated within the existing “bacterial” structure, or the ribosomal protein was  
291 already predisposed for mitochondrial import. Since RNA-binding regions show similarity to  
292 mitochondrial targeting signals with both requiring positively charged and hydrophobic amino  
293 acids – this was an appealing hypothesis.

294 To investigate both possibilities, we compared average MTS prediction scores of Mrp17  
295 (and other structurally conserved MRPs) to their closest bacterial homologs with known  
296 structure, i. e. *Escherichia coli* ribosomal proteins (Fig. 5B, Fig. S10). Two out of the 10  
297 structurally conserved proteins that lacked cleavable MTS, indeed had much higher MTS  
298 prediction scores in mitoribosomes compared to bacterial ribosome meaning that  
299 uncleavable MTS-like signals were developed at their N-termini. For other proteins, both  
300 homologs had equally low scores (less than 0.5) indicating that some sequence properties of  
301 bacterial and mitoribosomal proteins are similar.

302 Next, we tested if these bacterial proteins already have properties that allow them to be  
303 imported into mitochondria *in vivo* by expressing them as GFP fusions in yeast (Fig. 5C, Fig.  
304 S11A). None of the proteins localized to mitochondria showing that these BRPs do not have  
305 an intrinsic mitochondrial targeting capacity and that targeting signals were incorporated into  
306 conserved MRP structures in the course of evolution. Interestingly, two of the proteins  
307 (EcL13 and EcL14) had an intrinsic nuclear targeting capacity which was tolerated by the  
308 cells (Fig. S11B).

309 We aimed to check if any particular sequence or structural features present in Mrp17  
310 compared to its *E. coli* homolog, protein S6 (EcS6) can be responsible for mitochondrial

311 targeting. Most prominent of these features are two loop extensions (the first one is not in  
312 the range of amino acids 30-60 but the second is at the end of it and contains additional  
313 positive charges) and the two Tom20-binding motifs (Fig. 5A,D). We therefore introduced  
314 these four Mrp17 features into the homologous regions of EcS6 altogether or in different  
315 combinations, but none supported mitochondrial targeting of the chimeric constructs fused to  
316 GFP (Fig 5D, Fig. S11C). *In vitro*, adding to EcS6 the whole targeting sequence of Mrp17  
317 (from amino acids 30 to 60, sufficient for translocation of DHFR<sub>mut</sub>) was still not sufficient for  
318 translocation of EcS6-DHFR<sub>mut</sub> when fused to it at the N-terminus (Fig. 5E) suggesting that  
319 the overall negative charge of EcS6 (-6.5, without C-terminal glutamines) strongly inhibits  
320 mitochondrial import of chimeric constructs. When the same domain, Mrp17<sub>30-60</sub>, was  
321 introduced into its homologous position in EcS6 and fused to DHFR<sub>mut</sub>, such chimeric  
322 construct showed some import capacity (Fig. 5E). This indicates that in addition to the  
323 charge effects, the import signal contained in Mrp17<sub>30-60</sub> is also dependent on its spatial  
324 context to be functional.

325 Based on the comparison with the bacterial homolog, we suggest that the main features  
326 ensuring mitochondrial import of Mrp17 are the Tom20-binding motifs and its overall positive  
327 charge both of which were acquired without significant structural rearrangements.

328

## 329 Discussion

330 In this work we collected the available information on the MTSs of yeast MRPs from  
331 proteomic and structural studies as well as MTS prediction algorithms. Using *in vivo*  
332 structure-function assays we found that some MRPs possessed internal targeting signals  
333 that can be poorly predicted. We characterized the internal targeting signal of Mrp17 in more  
334 detail and found that it shares some features and import pathway with regular MTS-  
335 containing proteins.

336 Why would Mrp17 and other MRPs rely on internal signals instead of evolving a canonical N-  
337 terminal MTS? For Mrp17 and other MRPs that originated from bacterial ancestors and have  
338 not acquired any additional sequence extensions – they may have been simply because  
339 they did not need to evolve new signals as they already possessed mitochondrial import  
340 capacity due to their positive charge and hydrophobicity that are needed to bind ribosomal  
341 RNA. Such intrinsic import capacity was indeed shown for some *E. coli* proteins (Lucattini et  
342 al., 2004). However, in our work even strongly positively charged *E. coli* ribosomal proteins  
343 S12, S16, L13, and L14, although structurally conserved with their MRP homologs, were not  
344 targeted to mitochondria when expressed in yeast suggesting no initial targeting  
345 predisposition (Fig. 5C). Instead, we propose that the N-termini of these proteins were too

346 conserved to be extended with a cleavable MTS. So proteins, such as Mrp17, had to  
347 accommodate a targeting signal elsewhere in their sequences.

348 The N-terminus of Mrp17 is tightly positioned on the contact with neighboring proteins (Fig.  
349 6A, Fig. S12A). If this interface arose before the final maturation of the mitochondrial protein  
350 import system, it would create challenges for the evolution of an N-terminal targeting signal.  
351 In principle, such an engagement of the N-terminus in a structural interface can still be kept  
352 with a cleavable MTS if proteases cleave the protein precisely before the first structurally  
353 conserved residue. Indeed, some MRPs have evolved in that way (Fig. S10). We  
354 hypothesize that for Mrp17, however, such precise cleavage could not evolve. First reason  
355 for that is that the two first amino acids were too conserved to be adjusted for a cleavage  
356 site. Second, an intermediate stage of cleavable MTS evolution, which could be a sub-  
357 optimally cleaved N-terminus with few extra amino acids, could not be accommodated in the  
358 structure, so it never got to evolve a precisely cleaved MTS. Instead, Mrp17 remodeled the  
359 charge for the whole protein and developed internal targeting signals. Interestingly, the main  
360 signal identified in our work was not positioned in structurally distinct areas that are different  
361 between Mrp17 and EcS6 (Fig. 5A,D; loop expansions, C-terminal region) but mostly  
362 distributed between amino acids 30-60 which form a lot of new protein-protein contacts  
363 within the mitoribosome compared to the bacterial ribosome (Fig. S12A,B). So, the Mrp17  
364 targeting signal might have co-evolved with protein-protein interactions which is similar to  
365 the evolution of nucleolar-targeting signals in cytosolic ribosomal proteins (Melnikov et al.,  
366 2015).

367 Can structural constraints also explain why other MRPs did not develop cleavable MTSs? To  
368 assay that, we divided all MRPs into three groups according to the relative position of their  
369 MTS cleavage site (if present) and the first structured residue (Fig. 6B). We hypothesized  
370 that despite being involved in structure formation, the proteins that developed an MTS  
371 precisely cleaved off before the first structured residue might have N-termini less buried in  
372 the structure that could provide some flexibility for MTS cleavage evolution compared to the  
373 proteins that failed to develop an MTS and have a deeply buried N-terminus, like Mrp17.  
374 However, this was not the case and these two groups had their N-termini equally deeply  
375 buried in the structure (Fig. 6C, “No MTS” and “Precise MTS” groups). The validity of such  
376 measurement was confirmed by the fact that the MRP N-termini with few more unstructured  
377 residues before the structure start are indeed more often positioned on the ribosome surface  
378 (Fig. 6C, “Other” group). Thus, there is no strict limitation for a buried N-terminus to develop  
379 an MTS.

380 Interestingly, we found that the N-termini without a cleavable MTS had more protein and less  
381 RNA around them in the ribosome structure with Mrp17 being an extreme example (Fig.

382 6B,C). This suggests that unlike protein-protein contacts, protein-RNA contacts can be more  
383 permissible to the change in the protein component that will allow the adjustment of the N-  
384 terminus for protease cleavage. Our observation agrees with the study of sequence  
385 conservation of ribosomal proteins that revealed that amino acids on the protein-RNA  
386 interfaces are indeed less conserved than the amino acids on the protein-protein interfaces  
387 (Pilla and Bahadur, 2019). Supposedly, RNA-protein interfaces are the most ancient and  
388 important for ribosome assembly, so their smaller conservation compared to protein-protein  
389 interfaces might seem counterintuitive (Fox, 2010). However, this could be explained by the  
390 nature of protein-RNA binding that often relies on positively charged and hydrophobic  
391 amino-acids while the fine shape of the protein surface is not so important. On the other  
392 hand, protein-protein interfaces very much rely on the exact match of surface shapes which  
393 makes amino-acid substitutions much more detrimental for the interface integrity.

394 Still, involvement in protein-protein contacts does not fully explain the absence of a  
395 cleavable MTS in some less deeply buried MRPs (Fig. 6C) indicating that other factors might  
396 be at play. Some possible explanations can be that a new MRP is recruited to the ribosome  
397 with its targeting signal already positioned elsewhere in its sequence. Another option is that  
398 a recruited protein has a normal cleavable MTS but after recruitment, the MTS loses its  
399 cleavage site and becomes an integral part of the structure still positioned on the ribosome  
400 surface. It is also possible that in some MRPs the flexible N-terminal extensions play other  
401 important roles incompatible with N-terminal targeting signal properties. In the future, more  
402 systematic analysis of mitoribosome structures from different organisms can shed light on  
403 the complex interplay between the evolution of mitoribosome assembly on one side and the  
404 targeting signals of its components on the other.

405 To summarize, we suggest that at least some of the non-canonical targeting signals can  
406 develop in MRPs not only to fulfill certain functions, such as in the case of Mrp10 and Mrp132  
407 (Bonn et al., 2011; Longen et al., 2014), but under the pressure of structural constraints  
408 imposed by the mitoribosome assembly. It seems that unlike OXPHOS complexes, which  
409 also underwent complex evolution in mitochondria (Sluis et al., 2015), protein components of  
410 mitoribosome more often use their N-termini to establish important interactions and thus  
411 could not so easily develop a cleavable MTS (Fig. 6D). Instead, they developed multiple  
412 internal targeting signals of different strengths such as those found in Mrp17. This might  
413 have been relatively easy for ribosomal proteins that either already contain a lot of positive  
414 charges, or can easily increase their content due to abundant protein-RNA contacts. An  
415 alternative strategy would be to place a targeting signal on the C-terminus. For now, the only  
416 known matrix protein with a C-terminal targeting signal is Hmi1 that also cannot tolerate an

417 N-terminal extension (Lee et al., 1999). Such diversity of mitochondrial targeting signals  
418 highlights the need for better targeting signal prediction algorithms.

419 In this work we have shown that many MRPs have unconventional, non-cleavable targeting  
420 signals that can use the same import pathway as a regular MTS. This demonstrates an  
421 incredible versatility of the mitochondrial import system that can accommodate such a range  
422 of substrates and poses the question what is the mechanistic basic of balancing such  
423 versatility with the specificity of protein import process.

424

## 425 **Acknowledgements**

426 We are grateful to Prof. Ada Yonath and Dr. Anat Bashan for their valuable comments and  
427 discussion, and to Victor Tobiasson and Alexey Amunts for their advice on structure  
428 analysis. We thank Amir Fadel for technical help with microscopy and growth assays, and  
429 Nikolaus Pfanner for temperature-sensitive yeast mutants. We thank Einat Zalckvar for  
430 critical reading of the manuscript.

431 Collaborative work between Herrmann and Schuldiner labs is supported by a DIP  
432 collaborative grant (MitoBalance). Work in the Schuldiner lab is supported by an ERC CoG  
433 (OnTarget 864068). We are grateful for funding from the Deutsche Forschungsgemeinschaft  
434 (HE2803/9-1 to J.M.H.). Y.B. is supported by EMBO Long-term postdoctoral fellowship. M.S  
435 in an incumbent of the Dr. Gilbert Omenn and Martha Darling Professorial Chair in Molecular  
436 Genetics. The robotic system of the Schuldiner lab was purchased through the kind support  
437 of the Blythe Brenden-Mann Foundation.

438

## 439 **Materials and Methods**

### 440 *Yeast strains and plasmids*

441 All yeast strains used for fluorescent protein expression and imaging were constructed on  
442 the BY4741 haploid or BY4743 diploid background (Brachmann et al., 1998). For  
443 mitochondria purification we used W303 background and for growth rescue with plasmid  
444 shuffling – YPH499 background. The strains used in this study are listed in Table S2. All  
445 strains were constructed using standard LiAc/ssDNA/PEG based transformation protocol  
446 (Gietz and Woods, 2006). For transformation we used the standard plasmids for PCR-based  
447 tagging and knock outs (Janke et al., 2004; Longtine et al., 1998) and plasmids generated in  
448 this study (Table S3). Mutant versions of Mrp17 genes and genes for bacterial ribosomal  
449 proteins optimized for expression in yeast were ordered from GeneWiz or Genescript. When  
450 strains were constructed by genomic integration, primers were designed using

451 Primers4Yeast (<http://www.weizmann.ac.il/Primers-4-Yeast>)(Yofe and Schuldiner, 2014) or  
452 manually if the gene was truncated. Primers used in this study are listed in Table S4.

453

#### 454 *Yeast growth*

455 Yeast cells were grown on either liquid media or solid media that contained 2.2% agar. For  
456 selection only for antibiotic resistance yeast cells were grown on YPD media (2% peptone,  
457 1% yeast extract, 2% glucose) supplemented with nourseothricin (NAT) to 0.2 g/l. For  
458 auxotrophic selections yeast were grown in SD media (0.67% yeast nitrogen base without  
459 amino acids and with ammonium sulfate, 2% glucose, and OMM amino acid mix (Hanscho  
460 et al., 2012)) if necessary supplemented with the same amount of antibiotic.

461

#### 462 *Growth assays*

463 For growth assays with plate reader the strains were inoculated in 96-well plate 1 day before  
464 the experiment start if grown in fermentative media (YPD, see above) or 2 days before the  
465 experiment if grown in fermentative media YPGlycerol (2% peptone, 1% yeast extract, 2%  
466 glycerol) at 30°C with 500 rpm shaking in automated Liconic incubator. On the day of  
467 experiment the saturated cultures were diluted 1:50 in fresh media using EVO Freedom  
468 liquid handler (Tecan) and incubated at 30°C with shaking. The optical density  
469 measurements at 600 nm were taken every 30 min with the SPARK plate reader (Tecan).  
470 Each assay was repeated 2 times (Fig. S5).

471 For drop dilution assay, the yeast cultures in the phase of exponential growth ( $OD_{600} \sim 0.6$ )  
472 were sedimented and diluted in fresh media to the  $OD=0.1$ . This suspension was serially  
473 diluted  $\times 10$  and 2.5  $\mu$ l of each dilution was spotted on the agar plate using a multichannel  
474 pipette. The plates were incubated for 2 days at 24°, 30°, and 37°C and imaged using  
475 smartphone camera.

476

#### 477 **Analysis of translation start site using ribosome profiling**

478 To check for possible mis-annotation of the translation start sites of MRPs in the  
479 *Saccharomyces* genome database, we re-analyzed data from a ribosome profiling study that  
480 was specifically designed to detect translation initiation sites (ref. Knöringer, Groh, Krämer et  
481 al., in preparation; data available at GEO with the accession number GSE172017, access  
482 code available upon request). Briefly, ribosome profiling libraries of yeast cells (YPH499)  
483 were prepared as described (Stein et al., 2019) with the following modification: In one

484 replicate, 100  $\mu\text{g/ml}$  cycloheximide was added to the yeast culture 2 min before harvesting  
485 and lysis, while in the other replicate, cells were not in contact with cycloheximide prior to  
486 cell lysis. Cycloheximide inhibits translation elongation, but not translation initiation, which  
487 results in an enrichment of ribosome footprints at translation initiation sites in CHX-treated  
488 samples compared to untreated samples. Ribosome footprints were sequenced and aligned  
489 to the yeast genome. Footprint densities along the annotated open reading frames of MRP  
490 genes were analyzed and the translation start site was re-annotated based on the following  
491 criteria: (1) the presence of contiguous ribosome footprints in all samples (previously  
492 annotated introns were taken into consideration); (2) the presence of an enrichment of  
493 footprints in the CHX-treated sample at the very 5' position of the suspected ORF; (3) the  
494 presence of an AUG codon at the suspected start site.

495  
496

497

#### 498 *Fluorescence microscopy*

499 The day before the experiment yeast were grown to saturation. On the day of experiment the  
500 saturated culture was diluted 1:50 in SD media without selection or with just auxotrophic  
501 selections. Cells were grown for 4 h and applied on glass-bottom plates coated with  
502 concanavalin A and left for 20 min to adhere. If mitochondria needed to be visualized, the  
503 solution was removed from the wells and 50 nM MitoTracker Orange CMTMRos  
504 (ThermoFisher #M7510) diluted in imaging media (SD media with complete set of amino  
505 acids but without riboflavin) was placed in the wells for 10 min. Imaging was performed in  
506 fresh imaging media. Cells were imaged using VisiScope Confocal Cell Explorer system  
507 consisting of Olympus IX83 microscope, Zeiss Yokogawa spinning disk scanning unit  
508 equipped with PCO-Edge sCMOS camera controlled by VisiView software. Images were  
509 recorded with 488 nm laser illumination for GFP channel and 561 nm laser illumination for  
510 MitoTracker Orange and 60 $\times$  oil objective. Micrographs were cropped, and slightly adjusted  
511 for brightness and contrast using Fiji (Schindelin et al., 2012).

512

#### 513 *Data analysis*

514 The data on the first amino acid in the mitoribosome structures were extracted directly from  
515 the mmCIF files of PDB entries 6WD0 (Loveland et al., 2020), 5MRC (Desai et al., 2017),  
516 6YWS, 6YW5 (Itoh et al., 2020), 6NU2 (Koripella et al., 2019), 6GAW (Kummer et al., 2018),  
517 6XYW (Waltz et al., 2020), 6HIV (Ramrath et al., 2018), 6ZP1 (Tobiasson and Amunts,

518 2020) using PDBeCIF (<https://pypi.org/project/PDBeCif/>). The number of atoms around each  
519 C-alpha atom were calculated from this data using Python (McKinney, 2010).

520 The cleavage site in MRP N-termini was annotated from the following sources with priority  
521 as listed: (1) original publication with N-terminal sequencing as cited by UniProt (Boguta et  
522 al., 1992; Dang and Ellis, 1990; Davis et al., 1992; Graack et al., 1988; Graack et al., 1991;  
523 Grohmann et al., 1989; Grohmann et al., 1991; Kitakawa et al., 1990; Kitakawa et al., 1997;  
524 Matsushita and Isono, 1993; Matsushita et al., 1989), (2) high-throughput N-terminal  
525 proteomic dataset (Vögtle et al., 2009), (3) cleavage site prediction by UniProt, (4) cleavage  
526 site prediction using MitoFates (Fukasawa et al., 2015). If the cleavage site annotation didn't  
527 agree with the structural data (cleavage annotated after the amino acid actually present in  
528 the structure), we took the annotation from the source of next priority. If none of the  
529 annotations agreed with the structure, the N-terminus cleavage site was marked as "NA"  
530 (Table S1).

531 Mitochondrial targeting sequence prediction scores were calculated using MitoProt (Claros  
532 and Vincens, 1996), TargetP1 (Emanuelsson et al., 2000), TargetP2 (Armenteros et al.,  
533 2019), and MitoFates (Fukasawa et al., 2015) as described. The profiles and propensities of  
534 iMTSLs were calculated as described (Backes et al., 2018; Boos et al., 2018). Protein  
535 charge and hydrophobic moments were calculated using EMBOSS suite (Rice, 2000).

536 Structures were visualized using ChimeraX (Goddard et al., 2018), and electrostatic  
537 potentials using Chimera (Pettersen et al., 2004). Structural alignments were performed  
538 using FATCAT (Li et al., 2020), sequence alignment was performed and visualized using  
539 UniPro UGENE (Okonechnikov et al., 2012).

540 All other data analysis was performed using MATLAB (MathWorks). Plots were produced  
541 using MATLAB, Microsoft Excel, R (R Core Team, 2020), and GraphPad Prism.

542

#### 543 *Miscellaneous*

544 The following procedures were carried out as published before: isolation of mitochondria and  
545 *in vitro* import experiments (Peleh et al., 2015) and plasmid shuffling (Backes et al., 2019).

546

547 List of Supplementary Materials

548 Figs. S1-S12

549 **Table S1.** Manual annotation of cleavable MTS's and other properties of yeast MRPs,

550 Legend appears in Table.



551 **Table S2.** *In vivo* characterization of 15 MRP N-termini targeting capacities. Legend appears  
552 in table.

553 **Table S3.** Yeast strains used in this study.

554 **Table S4.** Plasmids used in this study.

555 **Table S5.** Primers for yeast transformation used in this study.

556

## 557 **References**

558 **Amunts, A., Brown, A., Toots, J., Scheres, S. H. W. and Ramakrishnan, V.** (2015). The  
559 structure of the human mitochondrial ribosome. *Science* **348**, 95–98.

560 **Armenteros, J. J. A., Salvatore, M., Emanuelsson, O., Winther, O., Heijne, G. von,**  
561 **Elofsson, A. and Nielsen, H.** (2019). Detecting sequence signals in targeting  
562 peptides using deep learning. *Life Science Alliance* **2**,.

563 **Backes, S., Hess, S., Boos, F., Woellhaf, M. W., Gödel, S., Jung, M., Mühlhaus, T. and**  
564 **Herrmann, J. M.** (2018). Tom70 enhances mitochondrial preprotein import efficiency  
565 by binding to internal targeting sequences. *The Journal of Cell Biology* **217**, 1369–  
566 1382.

567 **Backes, S., Garg, S. G., Becker, L., Peleh, V., Glockshuber, R., Gould, S. B. and**  
568 **Herrmann, J. M.** (2019). Development of the Mitochondrial Intermembrane Space  
569 Disulfide Relay Represents a Critical Step in Eukaryotic Evolution. *Molecular Biology*  
570 *and Evolution* **36**, 742–756.

571 **Ban, N., Nissen, P., Hansen, J., Moore, P. B. and Steitz, T. A.** (2000). The Complete  
572 Atomic Structure of the Large Ribosomal Subunit at 2.4 Å Resolution. *Science* **289**,  
573 905–920.

574 **Ban, N., Beckmann, R., Cate, J. H., Dinman, J. D., Dragon, F., Ellis, S. R., Lafontaine, D.**  
575 **L., Lindahl, L., Liljas, A., Lipton, J. M., et al.** (2014). A new system for naming  
576 ribosomal proteins. *Curr Opin Struct Biol* **24**, 165–169.

577 **Bedwell, D. M., Strobel, S. A., Yun, K., Jongeward, G. D. and Emr, S. D.** (1989).  
578 Sequence and structural requirements of a mitochondrial protein import signal  
579 defined by saturation cassette mutagenesis. *Molecular and Cellular Biology* **9**, 1014–  
580 1025.

581 **Bertgen, L., Mühlhaus, T. and Herrmann, J. M.** (2020). Clingy genes: Why were genes for  
582 ribosomal proteins retained in many mitochondrial genomes? *Biochimica et*  
583 *Biophysica Acta (BBA) - Bioenergetics* **1861**, 148275.

584 **Boczonadi, V. and Horvath, R.** (2014). Mitochondria: Impaired mitochondrial translation in  
585 human disease. *The International Journal of Biochemistry & Cell Biology* **48**, 77–84.

586 **Boguta, M., Dmochowska, A., Borsuk, P., Wrobel, K., Gargouri, A., Lazowska, J.,**  
587 **Slonimski, P. P., Szczesniak, B. and Kruszewska, A.** (1992). NAM9 nuclear  
588 suppressor of mitochondrial ochre mutations in *Saccharomyces cerevisiae* codes for  
589 a protein homologous to S4 ribosomal proteins from chloroplasts, bacteria, and  
590 eucaryotes. *Molecular and Cellular Biology* **12**, 402–412.

- 591 **Bonn, F., Tatsuta, T., Petrunaro, C., Riemer, J. and Langer, T.** (2011). Presequence-  
592 dependent folding ensures MrpL32 processing by the m-AAA protease in  
593 mitochondria. *The EMBO journal* **30**, 2545–2556.
- 594 **Boos, F., Mühlhaus, T. and Herrmann, J. M.** (2018). Detection of Internal Matrix Targeting  
595 Signal-like Sequences (iMTS-Ls) in Mitochondrial Precursor Proteins Using the  
596 TargetP Prediction Tool. *Bio-protocol* **8**, e2474–e2474.
- 597 **Brachmann, C. B., Davies, A., Cost, G. J., Caputo, E., Li, J., Hieter, P. and Boeke, J. D.**  
598 (1998). Designer deletion strains derived from *Saccharomyces cerevisiae* S288C: A  
599 useful set of strains and plasmids for PCR-mediated gene disruption and other  
600 applications. *Yeast* **14**, 115–132.
- 601 **Bykov, Y. S., Rapaport, D., Herrmann, J. M. and Schuldiner, M.** (2020). Cytosolic Events  
602 in the Biogenesis of Mitochondrial Proteins. *Trends in Biochemical Sciences* **45**,  
603 650–667.
- 604 **Carter, A. P., Clemons, W. M., Brodersen, D. E., Morgan-Warren, R. J., Wimberly, B. T.**  
605 **and Ramakrishnan, V.** (2000). Functional insights from the structure of the 30S  
606 ribosomal subunit and its interactions with antibiotics. *Nature* **407**, 340–348.
- 607 **Claros, M. G. and Vincens, P.** (1996). Computational Method to Predict Mitochondrially  
608 Imported Proteins and their Targeting Sequences. *European Journal of Biochemistry*  
609 **241**, 779–786.
- 610 **Dang, H. and Ellis, S. R.** (1990). Structural and functional analyses of a yeast mitochondrial  
611 ribosomal protein homologous to ribosomal protein S15 of *Escherichia coli*. *Nucleic*  
612 *Acids Res* **18**, 6895–6901.
- 613 **Davis, S. C., Tzagoloff, A. and Ellis, S. R.** (1992). Characterization of a yeast  
614 mitochondrial ribosomal protein structurally related to the mammalian 68-kDa high  
615 affinity laminin receptor. *J. Biol. Chem.* **267**, 5508–5514.
- 616 **Desai, N., Brown, A., Amunts, A. and Ramakrishnan, V.** (2017). The structure of the  
617 yeast mitochondrial ribosome. *Science* **355**, 528–531.
- 618 **Desmond, E., Brochier-Armanet, C., Forterre, P. and Gribaldo, S.** (2011). On the last  
619 common ancestor and early evolution of eukaryotes: reconstructing the history of  
620 mitochondrial ribosomes. *Research in Microbiology* **162**, 53–70.
- 621 **Emanuelsson, O., Nielsen, H., Brunak, S. and von Heijne, G.** (2000). Predicting  
622 Subcellular Localization of Proteins Based on their N-terminal Amino Acid Sequence.  
623 *Journal of Molecular Biology* **300**, 1005–1016.
- 624 **Fox, G. E.** (2010). Origin and Evolution of the Ribosome. *Cold Spring Harb Perspect Biol* **2**,.
- 625 **Fukasawa, Y., Tsuji, J., Fu, S.-C., Tomii, K., Horton, P. and Imai, K.** (2015). MitoFates:  
626 Improved Prediction of Mitochondrial Targeting Sequences and Their Cleavage  
627 Sites. *Mol Cell Proteomics* **14**, 1113–1126.
- 628 **Gietz, R. D. and Woods, R. A.** (2006). Yeast Transformation by the LiAc/SS Carrier  
629 DNA/PEG Method. In *Yeast Protocol* (ed. Xiao, W.), pp. 107–120. Totowa, NJ:  
630 Humana Press.

- 631 **Goddard, T. D., Huang, C. C., Meng, E. C., Pettersen, E. F., Couch, G. S., Morris, J. H.**  
632 **and Ferrin, T. E.** (2018). UCSF ChimeraX: Meeting modern challenges in  
633 visualization and analysis. *Protein Sci* **27**, 14–25.
- 634 **Gornicka, A., Bragoszewski, P., Chroscicki, P., Wenz, L.-S., Schulz, C., Rehling, P. and**  
635 **Chacinska, A.** (2014). A discrete pathway for the transfer of intermembrane space  
636 proteins across the outer membrane of mitochondria. *MBoC* **25**, 3999–4009.
- 637 **Graack, H.-R., Grohmann, L. and Choli, T.** (1988). Mitochondrial ribosomes of yeast:  
638 Isolation of individual proteins and N-terminal sequencing. *FEBS Letters* **242**, 4–8.
- 639 **Graack, H. R., Grohmann, L. and Kitakawa, M.** (1991). The nuclear coded mitoribosomal  
640 proteins YmL27 and YmL31 are both essential for mitochondrial function in yeast.  
641 *Biochimie* **73**, 837–844.
- 642 **Greber, B. J. and Ban, N.** (2016). Structure and Function of the Mitochondrial Ribosome.  
643 *Annual Review of Biochemistry* **85**, 103–132.
- 644 **Grohmann, L., Graack, H.-R. and Kitakawa, M.** (1989). Molecular cloning of the nuclear  
645 gene for mitochondrial ribosomal protein YmL31 from *Saccharomyces cerevisiae*.  
646 *European Journal of Biochemistry* **183**, 155–160.
- 647 **Grohmann, L., Graack, H.-R., Kruft, V., Choli, T., Goldschmidt-Reisin, S. and Kitakawa,**  
648 **M.** (1991). Extended N-terminal sequencing of proteins of the large ribosomal subunit  
649 from yeast mitochondria. *FEBS Letters* **284**, 51–56.
- 650 **Hamelryck, T.** (2005). An amino acid has two sides: A new 2D measure provides a different  
651 view of solvent exposure. *Proteins: Structure, Function, and Bioinformatics* **59**, 38–  
652 48.
- 653 **Hanscho, M., Ruckerbauer, D. E., Chauhan, N., Hofbauer, H. F., Krahulec, S., Nidetzky,**  
654 **B., Kohlwein, S. D., Zanghellini, J. and Natter, K.** (2012). Nutritional requirements  
655 of the BY series of *Saccharomyces cerevisiae* strains for optimum growth. *FEMS*  
656 *Yeast Research* **12**, 796–808.
- 657 **Itoh, Y., Naschberger, A., Mortezaei, N., Herrmann, J. M. and Amunts, A.** (2020).  
658 Analysis of translating mitoribosome reveals functional characteristics of translation  
659 in mitochondria of fungi. *Nature Communications* **11**, 5187.
- 660 **Janke, C., Magiera, M. M., Rathfelder, N., Taxis, C., Reber, S., Maekawa, H., Moreno-**  
661 **Borchart, A., Doenges, G., Schwob, E., Schiebel, E., et al.** (2004). A versatile  
662 toolbox for PCR-based tagging of yeast genes: new fluorescent proteins, more  
663 markers and promoter substitution cassettes. *Yeast* **21**, 947–962.
- 664 **Kitakawa, M., Grohmann, L., Graack, H.-R. and Isono, K.** (1990). Cloning and  
665 characterization of nuclear genes for two mitochondrial ribosomal proteins in  
666 *Saccharomyces cerevisiae*. *Nucleic Acids Res* **18**, 1521–1529.
- 667 **Kitakawa, M., Graack, H.-R., Grohmann, L., Goldschmidt-Reisin, S., Herfurth, E.,**  
668 **Wittmann-Liebold, B., Nishimura, T. and Isono, K.** (1997). Identification and  
669 Characterization of the Genes for Mitochondrial Ribosomal Proteins of  
670 *Saccharomyces Cerevisiae*. *European Journal of Biochemistry* **245**, 449–456.

- 671 **Koripella, R. K., Sharma, M. R., Risteff, P., Keshavan, P. and Agrawal, R. K.** (2019).  
672 Structural insights into unique features of the human mitochondrial ribosome  
673 recycling. *PNAS* **116**, 8283–8288.
- 674 **Kummer, E. and Ban, N.** (2021). Mechanisms and regulation of protein synthesis in  
675 mitochondria. *Nature Reviews Molecular Cell Biology* 1–19.
- 676 **Kummer, E., Leibundgut, M., Rackham, O., Lee, R. G., Boehringer, D., Filipovska, A.**  
677 **and Ban, N.** (2018). Unique features of mammalian mitochondrial translation  
678 initiation revealed by cryo-EM. *Nature* **560**, 263–267.
- 679 **Lee, C. M., Sedman, J., Neupert, W. and Stuart, R. A.** (1999). The DNA Helicase, Hmi1p,  
680 Is Transported into Mitochondria by a C-terminal Cleavable Targeting Signal. *J. Biol.*  
681 *Chem.* **274**, 20937–20942.
- 682 **Li, Z., Jaroszewski, L., Iyer, M., Sedova, M. and Godzik, A.** (2020). FATCAT 2.0: towards  
683 a better understanding of the structural diversity of proteins. *Nucleic Acids Research*  
684 **48**, W60–W64.
- 685 **Longen, S., Woellhaf, M. W., Petrungaro, C., Riemer, J. and Herrmann, J. M.** (2014).  
686 The Disulfide Relay of the Intermembrane Space Oxidizes the Ribosomal Subunit  
687 Mrp10 on Its Transit into the Mitochondrial Matrix. *Developmental Cell* **28**, 30–42.
- 688 **Longtine, M. S., Iij, A. M., Demarini, D. J., Shah, N. G., Wach, A., Brachat, A.,**  
689 **Philippson, P. and Pringle, J. R.** (1998). Additional modules for versatile and  
690 economical PCR-based gene deletion and modification in *Saccharomyces*  
691 *cerevisiae*. *Yeast* **14**, 953–961.
- 692 **Loveland, A. B., Demo, G. and Korostelev, A. A.** (2020). Cryo-EM of elongating ribosome  
693 with EF-Tu•GTP elucidates tRNA proofreading. *Nature* 1–6.
- 694 **Lucattini, R., Likić, V. A. and Lithgow, T.** (2004). Bacterial Proteins Predisposed for  
695 Targeting to Mitochondria. *Mol Biol Evol* **21**, 652–658.
- 696 **Lutz, T., Neupert, W. and Herrmann, J. M.** (2003). Import of small Tim proteins into the  
697 mitochondrial intermembrane space. *The EMBO Journal* **22**, 4400–4408.
- 698 **Martijn, J., Vosseberg, J., Guy, L., Offre, P. and Ettema, T. J. G.** (2018). Deep  
699 mitochondrial origin outside the sampled alphaproteobacteria. *Nature* **557**, 101–105.
- 700 **Matsushita, Y. and Isono, K.** (1993). Mitochondrial transport of mitoribosomal proteins,  
701 YmL8 and YmL20, in *Saccharomyces cerevisiae*. *European Journal of Biochemistry*  
702 **214**, 577–585.
- 703 **Matsushita, Y., Kitakawa, M. and Isono, K.** (1989). Cloning and analysis of the nuclear  
704 genes for two mitochondrial ribosomal proteins in yeast. *Molec. Gen. Genet.* **219**,  
705 119–124.
- 706 **McKinney, W.** (2010). Data Structures for Statistical Computing in Python.pp. 56–61.  
707 Austin, Texas.
- 708 **Melnikov, S., Ben-Shem, A., Yusupova, G. and Yusupov, M.** (2015). Insights into the  
709 origin of the nuclear localization signals in conserved ribosomal proteins. *Nature*  
710 *Communications* **6**, 7382.

- 711 **Melnikov, S., Manakongtreecheep, K. and Söll, D.** (2018). Revising the Structural  
712 Diversity of Ribosomal Proteins Across the Three Domains of Life. *Mol Biol Evol* **35**,  
713 1588–1598.
- 714 **Morgenstern, M., Stiller, S. B., Lübbert, P., Peikert, C. D., Dannenmaier, S., Drepper, F.,**  
715 **Weill, U., Höß, P., Feuerstein, R., Gebert, M., et al.** (2017). Definition of a High-  
716 Confidence Mitochondrial Proteome at Quantitative Scale. *Cell Reports* **19**, 2836–  
717 2852.
- 718 **Muto, T., Obita, T., Abe, Y., Shodai, T., Endo, T. and Kohda, D.** (2001). NMR  
719 identification of the Tom20 binding segment in mitochondrial presequences<sup>11</sup> Edited  
720 by M. F. Summers. *Journal of Molecular Biology* **306**, 137–143.
- 721 **Nolden, M., Ehses, S., Koppen, M., Bernacchia, A., Rugarli, E. I. and Langer, T.** (2005).  
722 The m-AAA Protease Defective in Hereditary Spastic Paraplegia Controls Ribosome  
723 Assembly in Mitochondria. *Cell* **123**, 277–289.
- 724 **Obita, T., Muto, T., Endo, T. and Kohda, D.** (2003). Peptide Library Approach with a  
725 Disulfide Tether to Refine the Tom20 Recognition Motif in Mitochondrial  
726 Presequences. *Journal of Molecular Biology* **328**, 495–504.
- 727 **Ohba, M. and Schatz, G.** (1987). Disruption of the outer membrane restores protein import  
728 to trypsin-treated yeast mitochondria. *The EMBO Journal* **6**, 2117–2122.
- 729 **Okonechnikov, K., Golosova, O., Fursov, M., and the UGENE team** (2012). Unipro  
730 UGENE: a unified bioinformatics toolkit. *Bioinformatics* **28**, 1166–1167.
- 731 **Ott, M., Amunts, A. and Brown, A.** (2016). Organization and Regulation of Mitochondrial  
732 Protein Synthesis. *Annual Review of Biochemistry* **85**, 77–101.
- 733 **Pagliarini, D. J., Calvo, S. E., Chang, B., Sheth, S. A., Vafai, S. B., Ong, S.-E., Walford,**  
734 **G. A., Sugiana, C., Boneh, A., Chen, W. K., et al.** (2008). A Mitochondrial Protein  
735 Compendium Elucidates Complex I Disease Biology. *Cell* **134**, 112–123.
- 736 **Peleh, V., Ramesh, A. and Herrmann, J. M.** (2015). Import of Proteins into Isolated Yeast  
737 Mitochondria. In *Membrane Trafficking: Second Edition* (ed. Tang, B. L.), pp. 37–50.  
738 New York, NY: Springer.
- 739 **Petrov, A. S., Wood, E. C., Bernier, C. R., Norris, A. M., Brown, A. and Amunts, A.**  
740 (2019). Structural Patching Fosters Divergence of Mitochondrial Ribosomes. *Mol Biol*  
741 *Evol* **36**, 207–219.
- 742 **Pettersen, E. F., Goddard, T. D., Huang, C. C., Couch, G. S., Greenblatt, D. M., Meng, E.**  
743 **C. and Ferrin, T. E.** (2004). UCSF Chimera--a visualization system for exploratory  
744 research and analysis. *J Comput Chem* **25**, 1605–1612.
- 745 **Pilla, S. P. and Bahadur, R. P.** (2019). Residue conservation elucidates the evolution of r-  
746 proteins in ribosomal assembly and function. *International Journal of Biological*  
747 *Macromolecules* **140**, 323–329.
- 748 **Poveda-Huertes, D., Matic, S., Marada, A., Habernig, L., Licheva, M., Myketin, L.,**  
749 **Gilsbach, R., Tosal-Castano, S., Papinski, D., Mulica, P., et al.** (2020). An Early  
750 mtUPR: Redistribution of the Nuclear Transcription Factor Rox1 to Mitochondria  
751 Protects against Intramitochondrial Proteotoxic Aggregates. *Molecular Cell* **77**, 180-  
752 188.e9.

- 753 **R Core Team** (2020). R: A language and environment for statistical computing. R  
754 Foundation for Statistical Computing, Vienna, Austria.
- 755 **Ramrath, D. J. F., Niemann, M., Leibundgut, M., Bieri, P., Prange, C., Horn, E. K.,**  
756 **Leitner, A., Boehringer, D., Schneider, A. and Ban, N.** (2018). Evolutionary shift  
757 toward protein-based architecture in trypanosomal mitochondrial ribosomes. *Science*  
758 **362**,.
- 759 **Rice, P.** (2000). EMBOSS: The European Molecular Biology Open Software Suite. *TIG* **16**,  
760 276–277.
- 761 **Roger, A. J., Muñoz-Gómez, S. A. and Kamikawa, R.** (2017). The Origin and  
762 Diversification of Mitochondria. *Current Biology* **27**, R1177–R1192.
- 763 **Sagan, L.** (1967). On the origin of mitosing cells. *Journal of Theoretical Biology* **14**, 225-IN6.
- 764 **Schindelin, J., Arganda-Carreras, I., Frise, E., Kaynig, V., Longair, M., Pietzsch, T.,**  
765 **Preibisch, S., Rueden, C., Saalfeld, S., Schmid, B., et al.** (2012). Fiji: an open-  
766 source platform for biological-image analysis. *Nature Methods* **9**, 676–682.
- 767 **Schluenzen, F., Tocilj, A., Zarivach, R., Harms, J., Gluehmann, M., Janell, D., Bashan,**  
768 **A., Bartels, H., Agmon, I., Franceschi, F., et al.** (2000). Structure of Functionally  
769 Activated Small Ribosomal Subunit at 3.3 Å Resolution. *Cell* **102**, 615–623.
- 770 **Shakya, V. P., Barbeau, W. A., Xiao, T., Knutson, C. S., Schuler, M. H. and Hughes, A.**  
771 **L.** (2021). A nuclear-based quality control pathway for non-imported mitochondrial  
772 proteins. *eLife* **10**, e61230.
- 773 **Sluis, V. D., O, E., Bauerschmitt, H., Becker, T., Mielke, T., Frauenfeld, J.,**  
774 **Berninghausen, O., Neupert, W., Herrmann, J. M. and Beckmann, R.** (2015).  
775 Parallel Structural Evolution of Mitochondrial Ribosomes and OXPHOS Complexes.  
776 *Genome Biol Evol* **7**, 1235–1251.
- 777 **Smits, P., Smeitink, J. A. M., van den Heuvel, L. P., Huynen, M. A. and Ettema, T. J. G.**  
778 (2007). Reconstructing the evolution of the mitochondrial ribosomal proteome.  
779 *Nucleic Acids Research* **35**, 4686–4703.
- 780 **Stein, K. C., Kriel, A. and Frydman, J.** (2019). Nascent Polypeptide Domain Topology and  
781 Elongation Rate Direct the Cotranslational Hierarchy of Hsp70 and TRiC/CCT.  
782 *Molecular Cell* **75**, 1117-1130.e5.
- 783 **Tobiasson, V. and Amunts, A.** (2020). Ciliate mitoribosome illuminates evolutionary steps  
784 of mitochondrial translation. *eLife* **9**, e59264.
- 785 **Vestweber, D. and Schatz, G.** (1988). Point mutations destabilizing a precursor protein  
786 enhance its post-translational import into mitochondria. *The EMBO Journal* **7**, 1147–  
787 1151.
- 788 **Vishwanath, P., Favaretto, P., Hartman, H., Mohr, S. C. and Smith, T. F.** (2004).  
789 Ribosomal protein-sequence block structure suggests complex prokaryotic evolution  
790 with implications for the origin of eukaryotes. *Molecular Phylogenetics and Evolution*  
791 **33**, 615–625.
- 792 **Vögtle, F.-N., Wortelkamp, S., Zahedi, R. P., Becker, D., Leidhold, C., Gevaert, K.,**  
793 **Kellermann, J., Voos, W., Sickmann, A., Pfanner, N., et al.** (2009). Global

- 794 Analysis of the Mitochondrial N-Proteome Identifies a Processing Peptidase Critical  
795 for Protein Stability. *Cell* **139**, 428–439.
- 796 **Vögtle, F.-N., Burkhart, J. M., Gonczarowska-Jorge, H., Kücükköse, C., Taskin, A. A.,**  
797 **Kopczynski, D., Ahrends, R., Mossmann, D., Sickmann, A., Zahedi, R. P., et al.**  
798 (2017). Landscape of submitochondrial protein distribution. *Nature Communications*  
799 **8**, 290.
- 800 **von Heijne, G.** (1986). Mitochondrial targeting sequences may form amphiphilic helices.  
801 *EMBO J* **5**, 1335–1342.
- 802 **Waltz, F. and Giegé, P.** (2019). Striking Diversity of Mitochondria-Specific Translation  
803 Processes across Eukaryotes. *Trends in Biochemical Sciences* **0**,.
- 804 **Waltz, F., Soufari, H., Bochler, A., Giegé, P. and Hashem, Y.** (2020). Cryo-EM structure of  
805 the RNA-rich plant mitochondrial ribosome. *Nature Plants* **6**, 377–383.
- 806 **Woellhaf, M. W., Hansen, K. G., Garth, C. and Herrmann, J. M.** (2014). Import of  
807 ribosomal proteins into yeast mitochondria. *Biochemistry and Cell Biology* **92**, 489–  
808 498.
- 809 **Yamano, K., Yatsukawa, Y., Esaki, M., Hobbs, A. E. A., Jensen, R. E. and Endo, T.**  
810 (2008). Tom20 and Tom22 Share the Common Signal Recognition Pathway in  
811 Mitochondrial Protein Import. *J. Biol. Chem.* **283**, 3799–3807.
- 812 **Yofe, I. and Schuldiner, M.** (2014). Primers-4-Yeast: a comprehensive web tool for  
813 planning primers for *Saccharomyces cerevisiae*. *Yeast* **31**, 77–80.
- 814 **Zaremba-Niedzwiedzka, K., Caceres, E. F., Saw, J. H., Bäckström, D., Juzokaite, L.,**  
815 **Vancaester, E., Seitz, K. W., Anantharaman, K., Starnawski, P., Kjeldsen, K. U.,**  
816 **et al.** (2017). Asgard archaea illuminate the origin of eukaryotic cellular complexity.  
817 *Nature* **541**, 353–358.
- 818

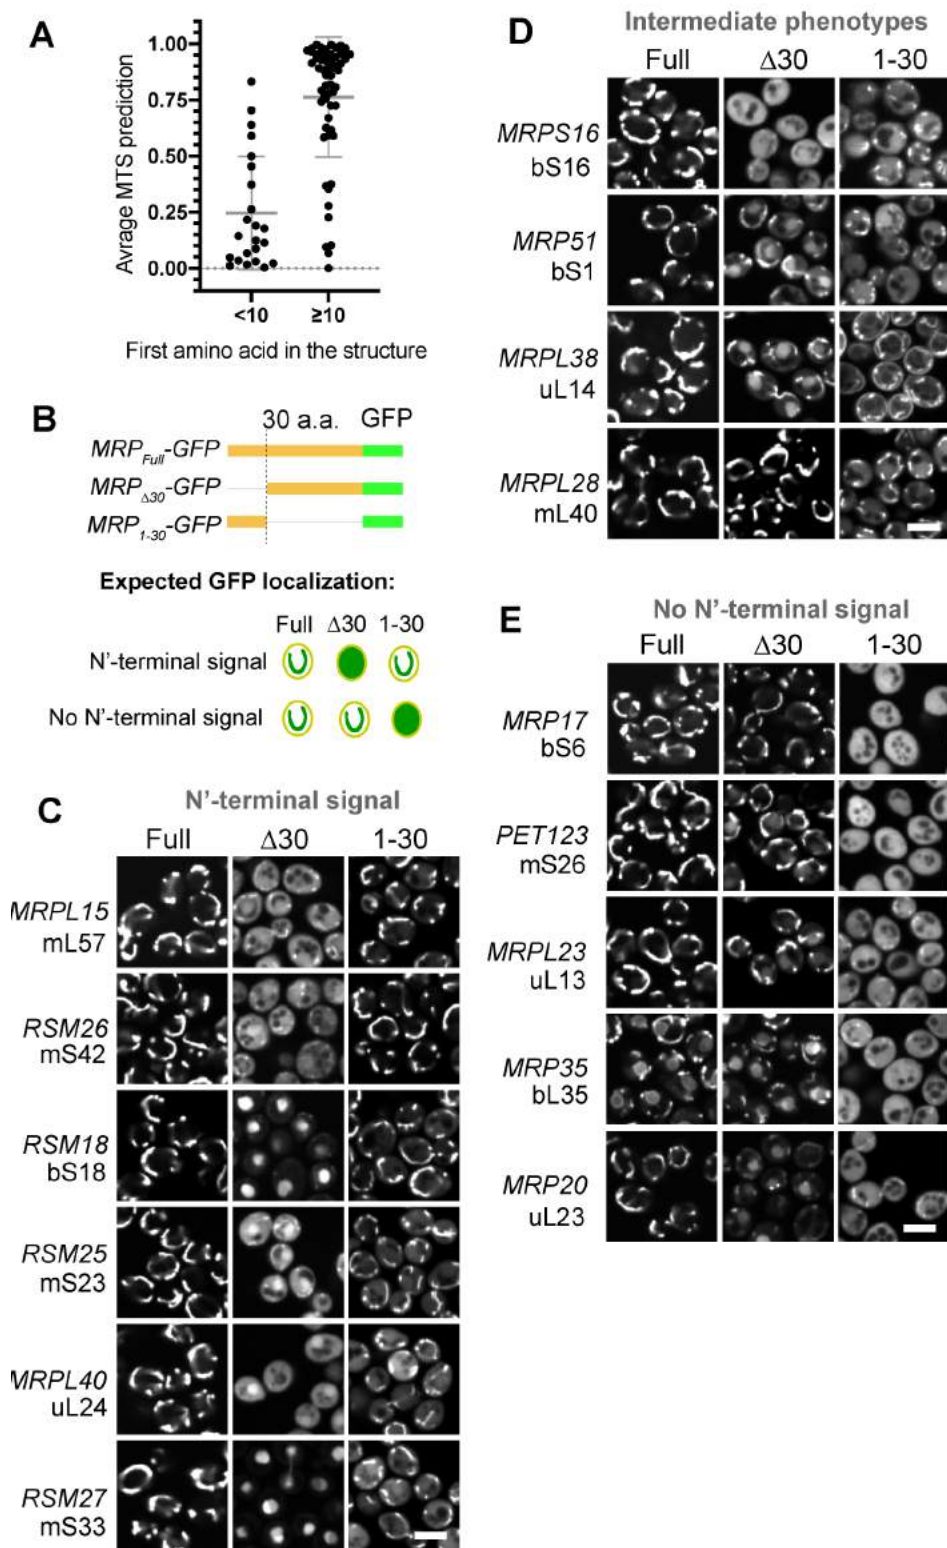

**Fig.1. Mitochondrial Ribosomal Proteins (MRPs) have various types of targeting signals.** (A) Yeast MRPs having uncleaved N-termini that can be tracked in the mitoribosome structure (PDB:5MRC) score much lower with MTS prediction algorithms (average of TargetP2 and MitoFates) compared to other MRPs that have their N-termini cleaved off or are not present in the structure (so might be flexible and outside the mitoribosome body). (B) Schematic of MRP truncations used to characterize targeting properties of MRP N-termini:  $MRP_{Full}$  as control,  $MRP_{\Delta 30}$  to check if the N-terminus is necessary,  $MRP_{1-30}$  to check if it is sufficient (top) and the schematics of expected GFP localization in case the N-terminus is MTS-like (necessary and sufficient) or not (bottom); (C)-(E) Micrographs collected in the GFP channel for each truncation (columns) of each studied MRP (rows) grouped by the N-terminus targeting properties based on theoretical expectation summarized in (B) with the MRPs possessing MTS-like N-termini in panel (C), MRPs with intermediate phenotype in panel (D) and MRPs without N-terminal signal in panel (E), for each MRP a yeast gene name and new nomenclature protein name is shown on the left. Scale bar for all micrographs is 5  $\mu$ m.



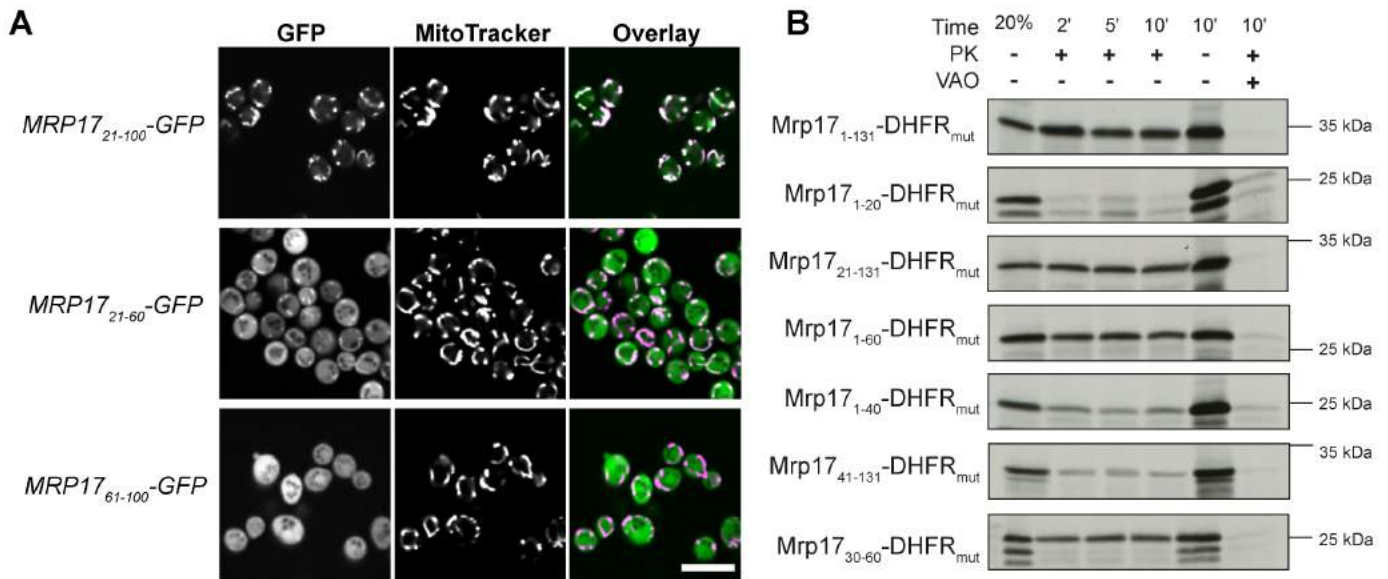

**Fig. 2. The non-canonical targeting and translocation signal of Mrp17 is located between amino acids 30 and 60.** (A) In vivo characterization of mitochondrial targeting capacity of different Mrp17 truncations fused to GFP visualized by fluorescent microscopy with MitoTracker Orange staining. Scale bar for all micrographs is 10  $\mu$ m. (B) Characterization of Mrp17 translocation signal using an in vitro import assay: shown are autoradiographs of full-length Mrp17 or its truncations fused to DHFR<sub>mut</sub>, translated in vitro with radiolabeled amino-acids, incubated with isolated yeast mitochondria for 2, 5, or 10 min, treated with proteinase K (PK) to remove nonimported proteins and visualized by SDS-PAGE/autoradiography. As a negative control, mitochondria were treated with valinomycin, antimycin and oligomycin (VAO) that eliminate membrane potential. For comparison, 20% of the protein used per import reaction was loaded on the first lane.

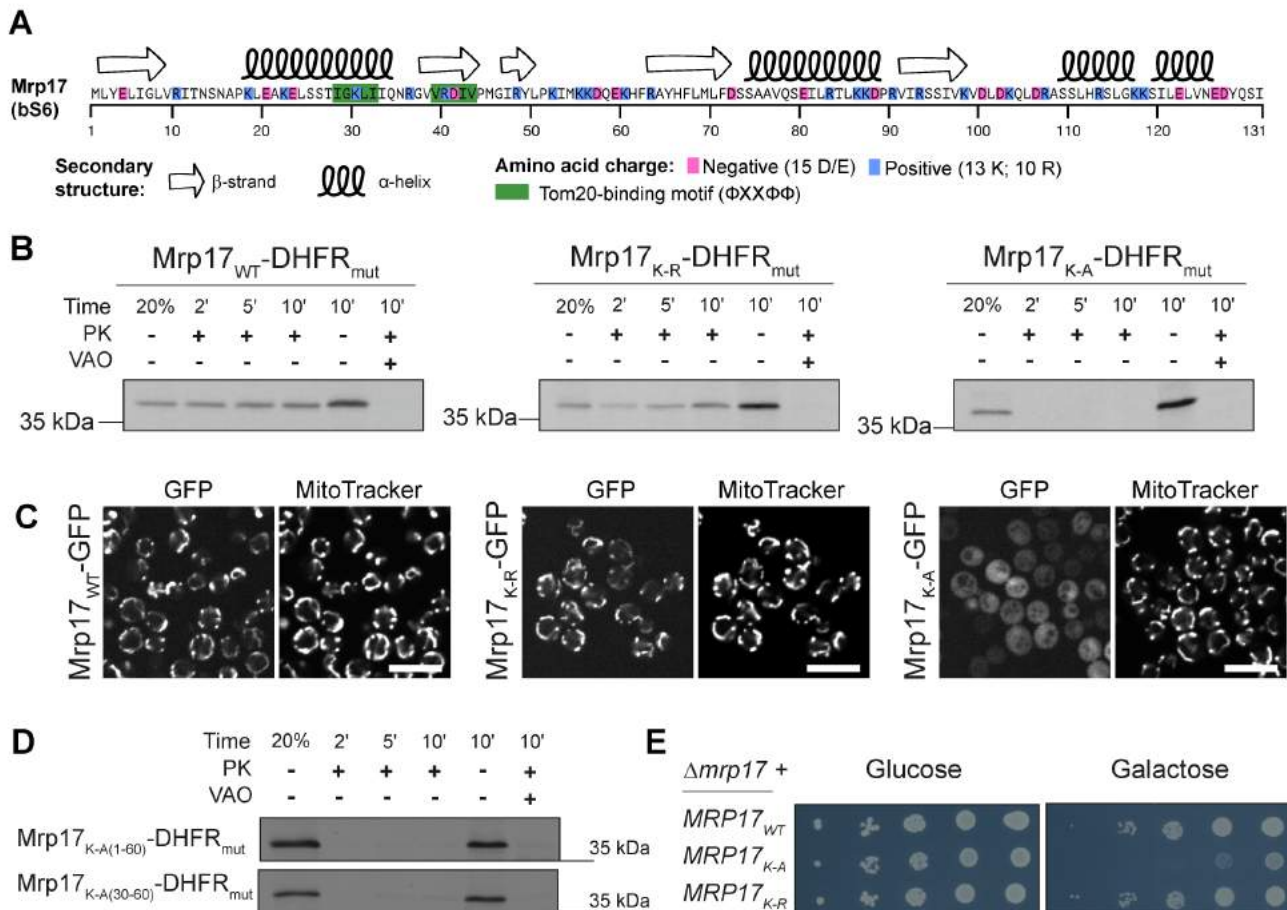

**Fig. 3. Positive charge and Tom20-binding motifs are important features of the Mrp17 targeting signal.**

(A) Primary sequence of Mrp17 highlighting charged amino-acids, Tom20-binding motifs and secondary structure (from PDB:5MRC); (B) In vitro mitochondria translocation capacity of WT Mrp17, Mrp17K-R with all lysines (K) substituted with arginines (R), and Mrp17K-A with all lysines (K) substituted with alanines (A) fused to DHFRmut. Import was performed as described in Fig. 2 legend. (C) In vivo mitochondrial targeting capability of WT Mrp17, Mrp17K-R, and Mrp17K-A fused to GFP. (D) Substitution of lysines with alanines in the regions 1-60 or 30-60 of Mrp17 abolishes mitochondrial import capacity. (E) Plasmids carrying the indicated Mrp17 variants were transformed into a  $\Delta$ mrp17 strain that harbored an MRP17 gene on an URA3-containing plasmid. The latter plasmid was removed by plasmid shuffling and the growth of the strains was assessed on glucose and galactose media. Scale bar for all micrographs is 10  $\mu$ m.

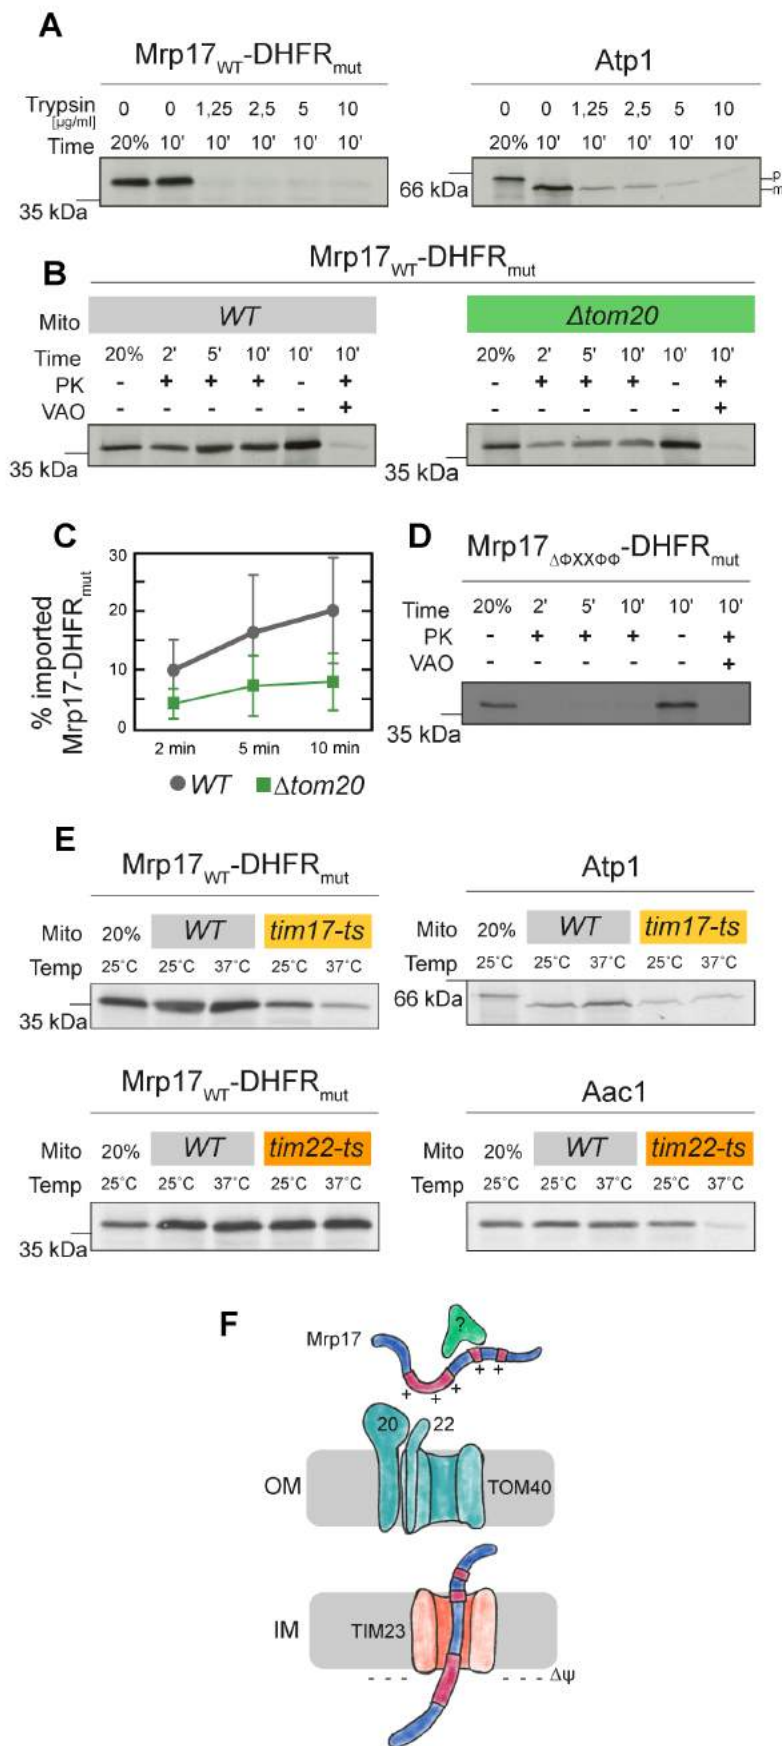

**Fig. 4. Mrp17 requires Tom20 for translocation into isolated mitochondria.** (A) The in vitro import of Mrp17-DHFR<sub>mut</sub> is sensitive to the elimination of outer mitochondrial membrane proteins by trypsinization (left), more so than the model import substrate Atp1 (right). Mitochondria were incubated with the indicated concentrations of trypsin and the import assay was performed as described in the legend for Fig. 2. Proteinase K (PK) was not added to the sample without mitochondria. (B) In vitro translocation of Mrp17-DHFR<sub>mut</sub> into mitochondria isolated from WT and  $\Delta$ tom20 yeast showing reduced translocation in  $\Delta$ tom20 background. (C) Quantification of the experiment in panel (B) repeated 3 times, whiskers correspond to minimum and maximum values. (D) Substitution of both Tom20-binding motifs ( $\Phi$ XX $\Phi$ ) with alanines abolishes Mrp17 mitochondrial import capacity. (E) Import of Mrp17-DHFR<sub>mut</sub> and control proteins Atp1 and Aac2 into WT, tim17-ts and tim22-ts mitochondria, import was performed at indicated temperatures, proteinase K was added to all samples except the loading control in the first lane of each autoradiograph (20% of protein amount used for each import reaction). (F) Mrp17 (blue) targeting and translocation model: positively charged internal signals (magenta) might bind yet unidentified targeting factors (green) and then are recognized at the outer membrane of mitochondria by the same receptors Tom20 and Tom22 as a regular MTS, then imported through TOM40 (teal) and TIM23 (orange) translocons.

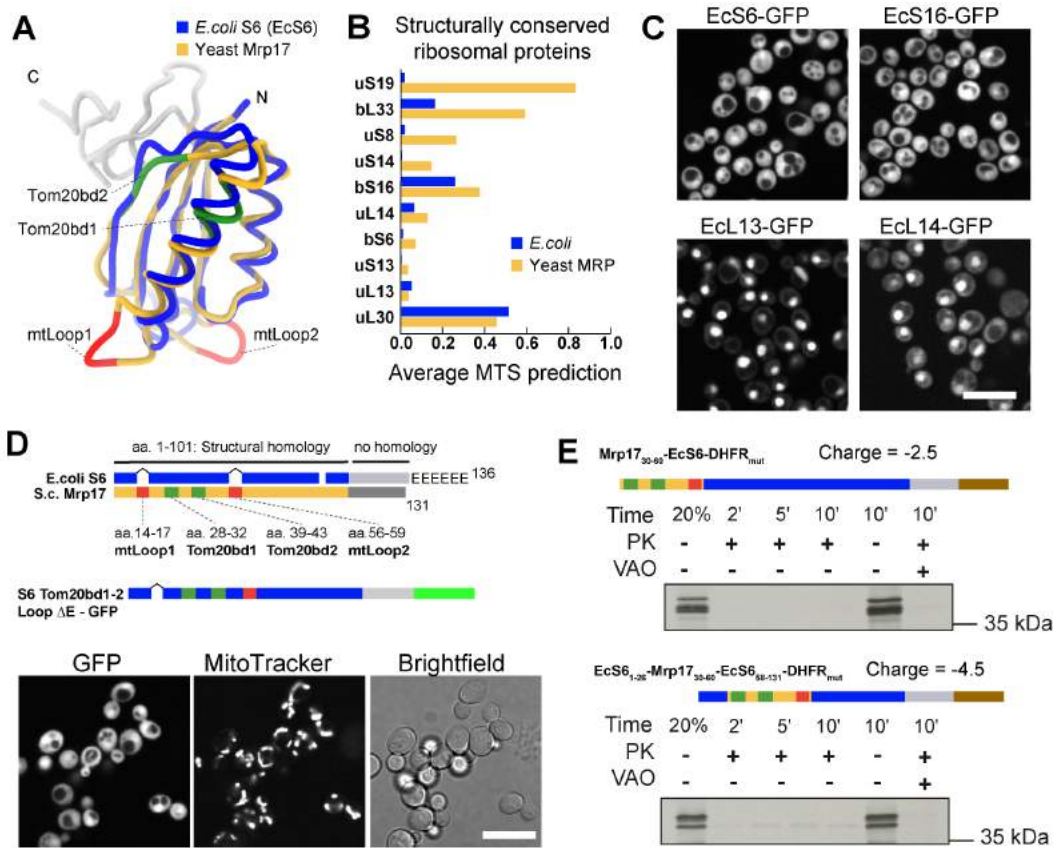

**Fig. 5. Bacterial homologs of MRPs have no mitochondrial import predisposition.** (A) Structural alignment of the yeast Mrp17 (from PDB:5MRC) and its *E. coli* homolog ribosomal protein S6 (from PDB: 6WD0) viewed from its cytosol-facing side, highlighting regions of structural homology (blue and yellow) and non-homologous C-terminal regions (grey), Tom20-binding domains in Mrp17 are highlighted in green and expanded loops in red, schematic summaries of such structural alignments for all MRPs and their bacterial homologs are shown in Fig. S10. (B) Average MTS prediction scores (MitoFates and TargetP2) for structurally conserved yeast MRPs and their bacterial homologs sorted by the difference between bacteria and mitochondria. (C) Expression of structurally conserved bacterial RPs fused to GFP in yeast cells. (D) Schematic summary of structural alignment of bacterial S6 and yeast Mrp17 shown in panel (A) highlighting additional features of Mrp17 structure (two loops and two Tom20-binding sites) and six glutamate residues (E's) at the C-terminus of bacterial S6 (top), schematic of chimeric construct of EcS6 that lacks C-terminal glutamines, but incorporates structural features of Mrp17 and is fused to GFP shown bright green (middle), and the result of expression of this chimeric construct in yeast (bottom). (E) Chimeric variants of EcS6-DHFR<sub>mut</sub> with Mrp17 amino acids 30-60 fused to it at the N-terminus or incorporated instead of the homologous region of S6 itself (top), and *in vitro* import of these constructs into isolated yeast mitochondria. Lanes are labeled as described in Fig. 2 legend (bottom). Scale bar in all micrographs is 10  $\mu$ m.

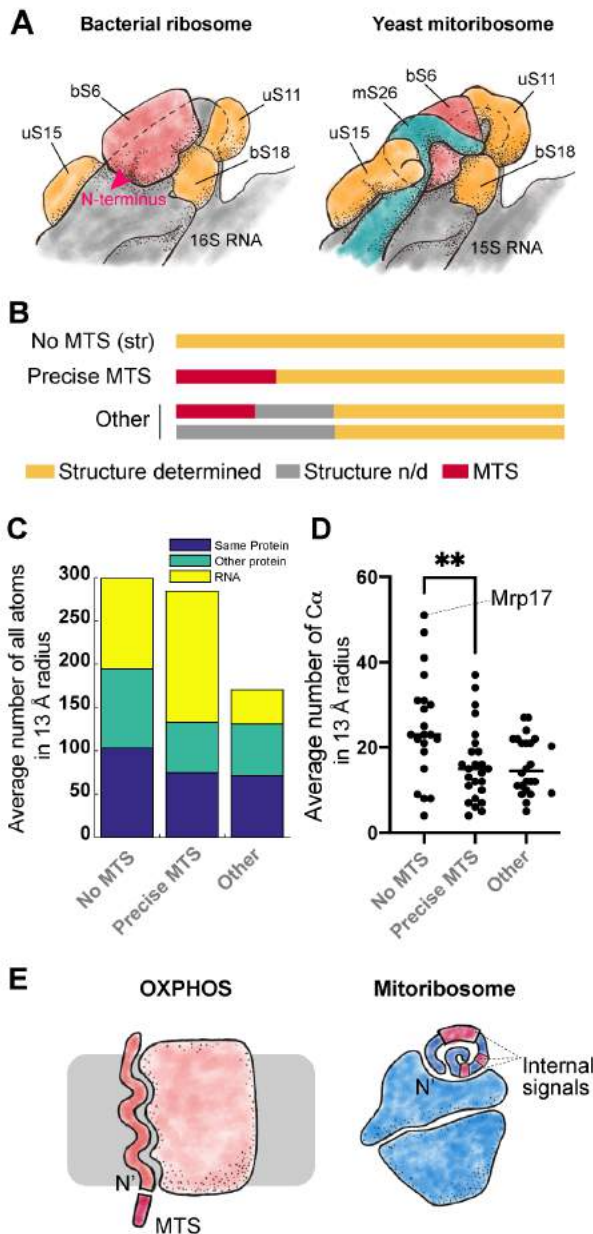

**Fig. 6. Structural constraints for the evolution of N-terminal mitochondrial targeting signals.** (A) Schematic depiction of the S6 protein (red) in the context of bacterial ribosome (after PDB:6WD0, left) and yeast mitochondrial ribosome (after PDB:5MRC, right) highlighting the position of the N-terminus of S6 (red arrow, only shown on the left image). Proteins homologous between bacterial and yeast structures are shown in orange, mitochondria-specific protein mS26 in teal and rRNA in grey. (B) MRPs divided in three groups depending on relative position of the MTS and structured residues: No MTS (str) – structure starts at the very N-terminus without cleavable MTS, Precise MTS – MTS is cleaved off 1-2 amino acids before the structure starts, Other – unstructured uncleaved amino acids present before the structure start. (C) MRP N-termini solvent exposure: average number of atoms belonging to the same protein, other protein chains or RNA in the 13Å radius from the first structured amino acid C $\alpha$  atom, plotted separately for proteins with their most N-terminus appearing in the structure vs proteins with precisely cleaved MTS (first structured amino acid is within 3 or less amino acids from the end of the MTS) and other proteins which have a longer unstructured extension calculated based on PDB:5MRC. (D) Same as (C) but only coordination number (number of C $\alpha$  atoms in the 13Å radius (Hamelryck, 2005)) is calculated. (E) Compared to OXPHOS complex components that usually have their N-termini free to develop an MTS (left), mitoribosomes often employ the MRP N-termini in binding interfaces which puts structural constraints on the development of N-terminal MTS and promotes the evolution of internal targeting sequences that can also take part in ribosome assembly (right).

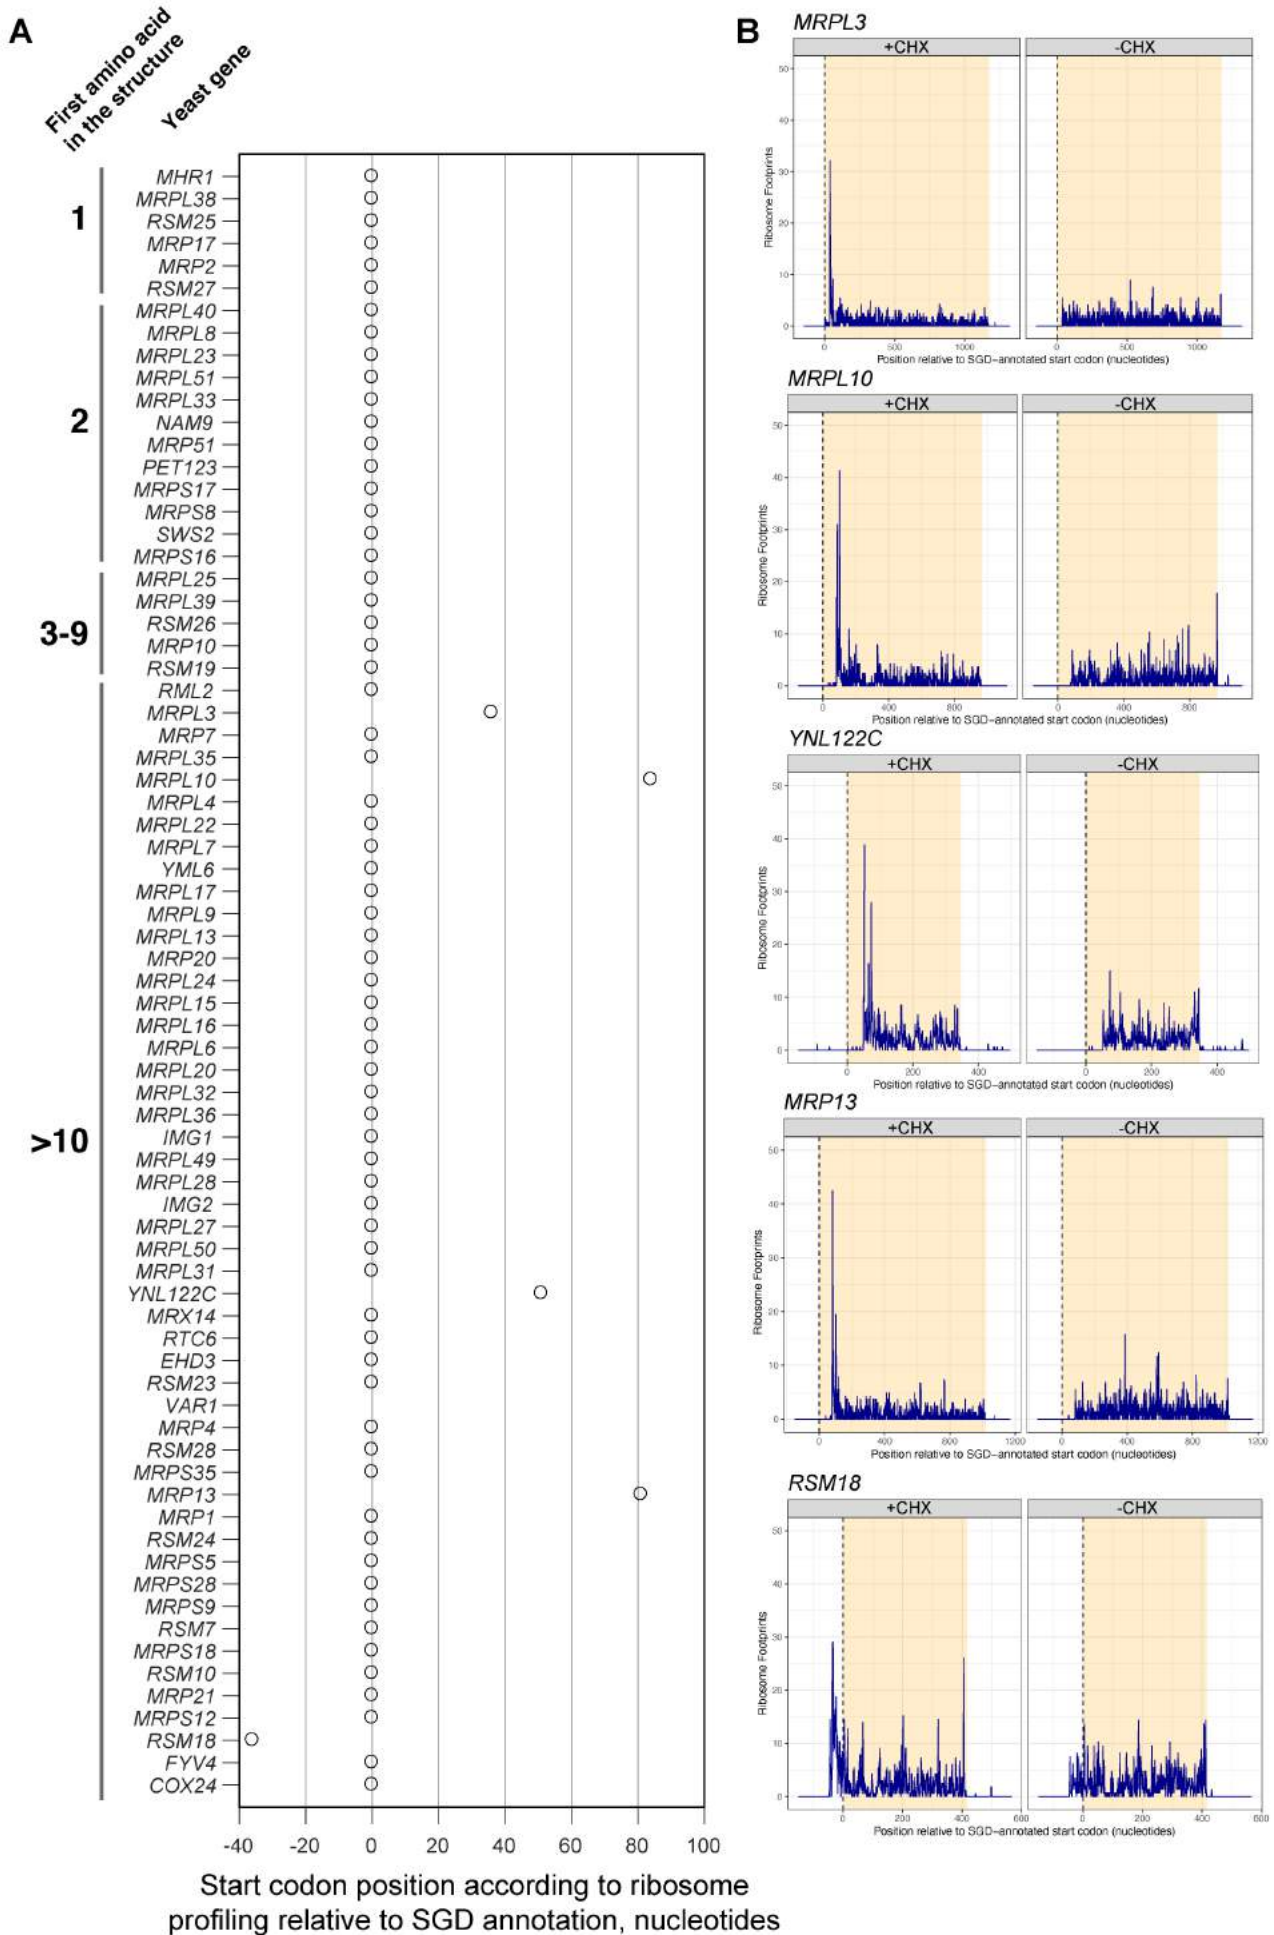

Fig. S1 - legend next page

**Fig. S1. RiboSeq reveals no mis-annotated upstream translation starts that can account for the missing N-terminal signals.** (A) For each MRP the translation start measured by RiboSeq is plotted relative to SGD annotation, revealing that only one protein has an N-terminal extension while 4 others have shorter N-termini, all of the misannotated proteins are reported to have an MTS (Table S1); no MRPs with their N-termini in the structure (first structured amino acid <10) had misannotated translation starts. (B) Ribosome footprints for each ORF with misannotated start codons in the presence of cycloheximide (+CHX, left) and without cycloheximide (-CHX, right), plotted relative to the ORF annotation in SGD (shaded in yellow).





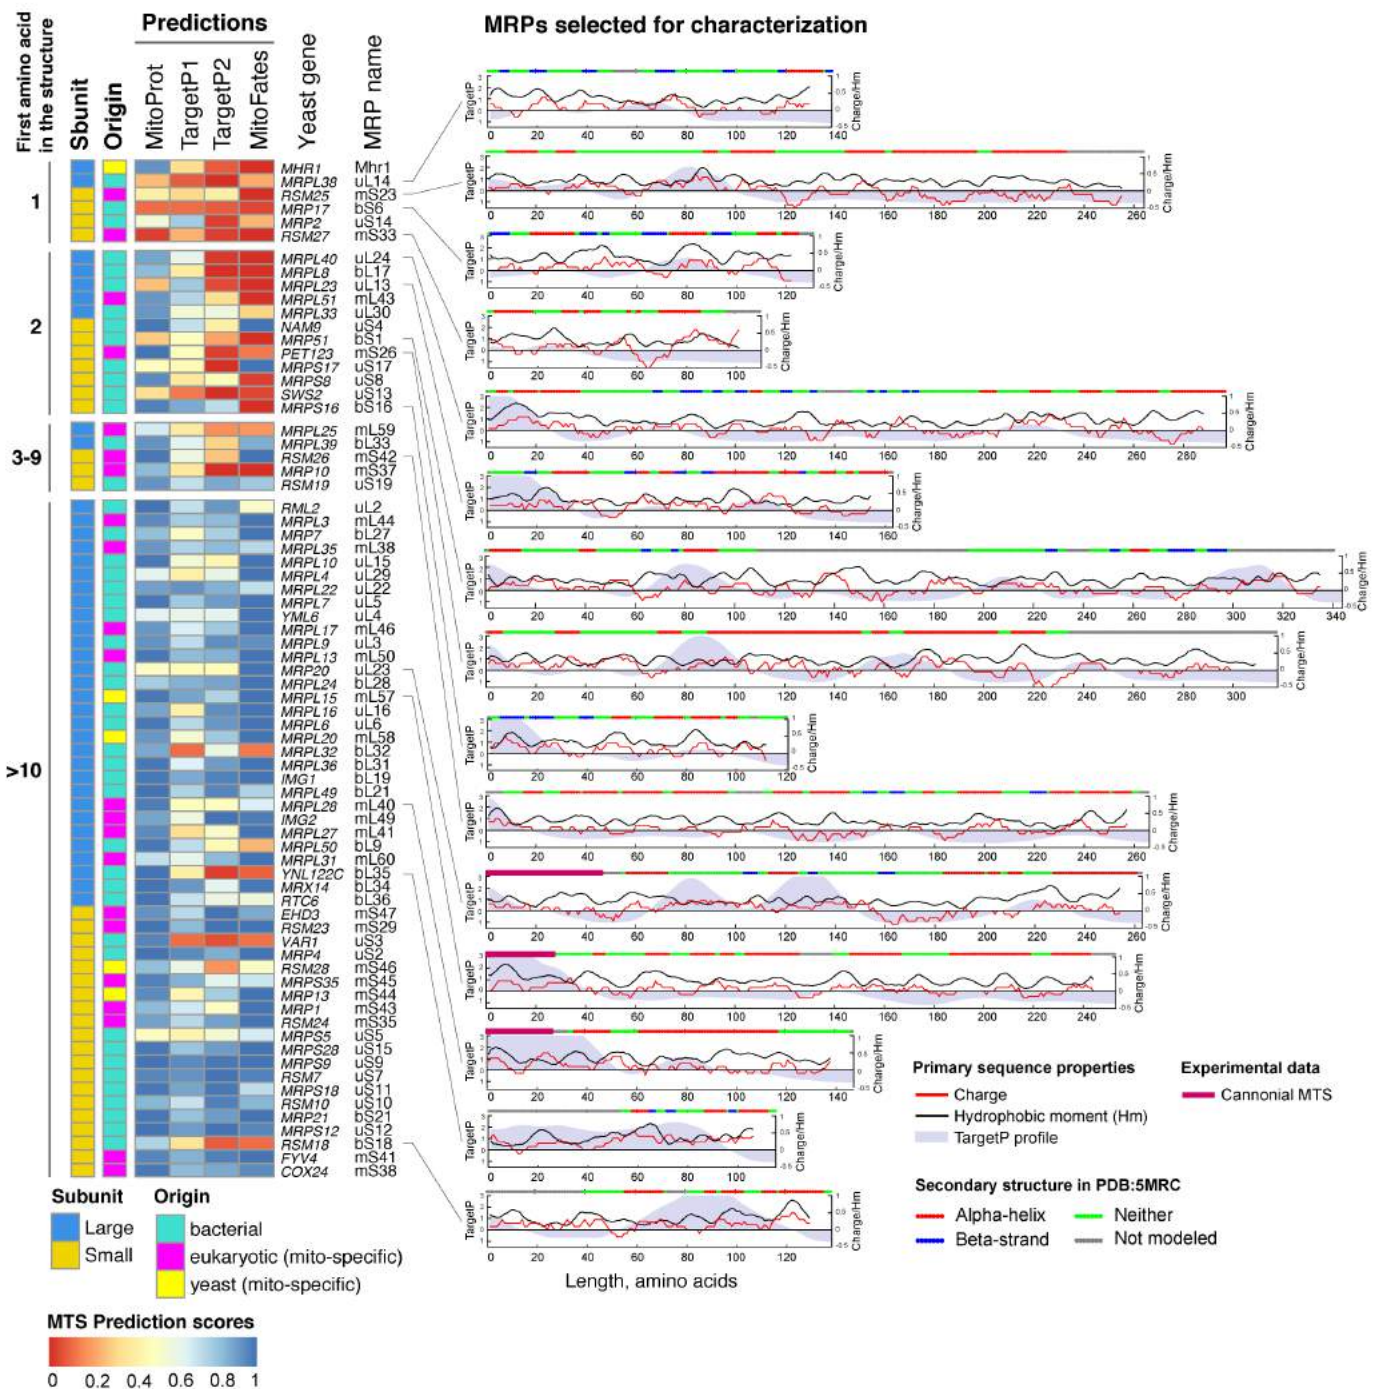

**Fig. S3. MRPs can be classified according to the presence of their most N-terminus inside the mitoribosome structure.** Left – MTS prediction scores for yeast MRPs first sorted in groups by the first amino acid with reported atomic coordinates in the structure PDB:5MRC, then by subunit and then by length with protein origin and subunit noted for each MRP. Right – primary and secondary sequence properties for 15 MRPs selected for further characterization showing a variety of N-terminal and internal targeting signal predictions, overall positive charge, presence of documented cleavable MTS, and a variety of N-terminal secondary structures. Universal ribosomal protein nomenclature is used (Ban et al. 2014), except for Mhr1 which is a yeast-specific MRP.

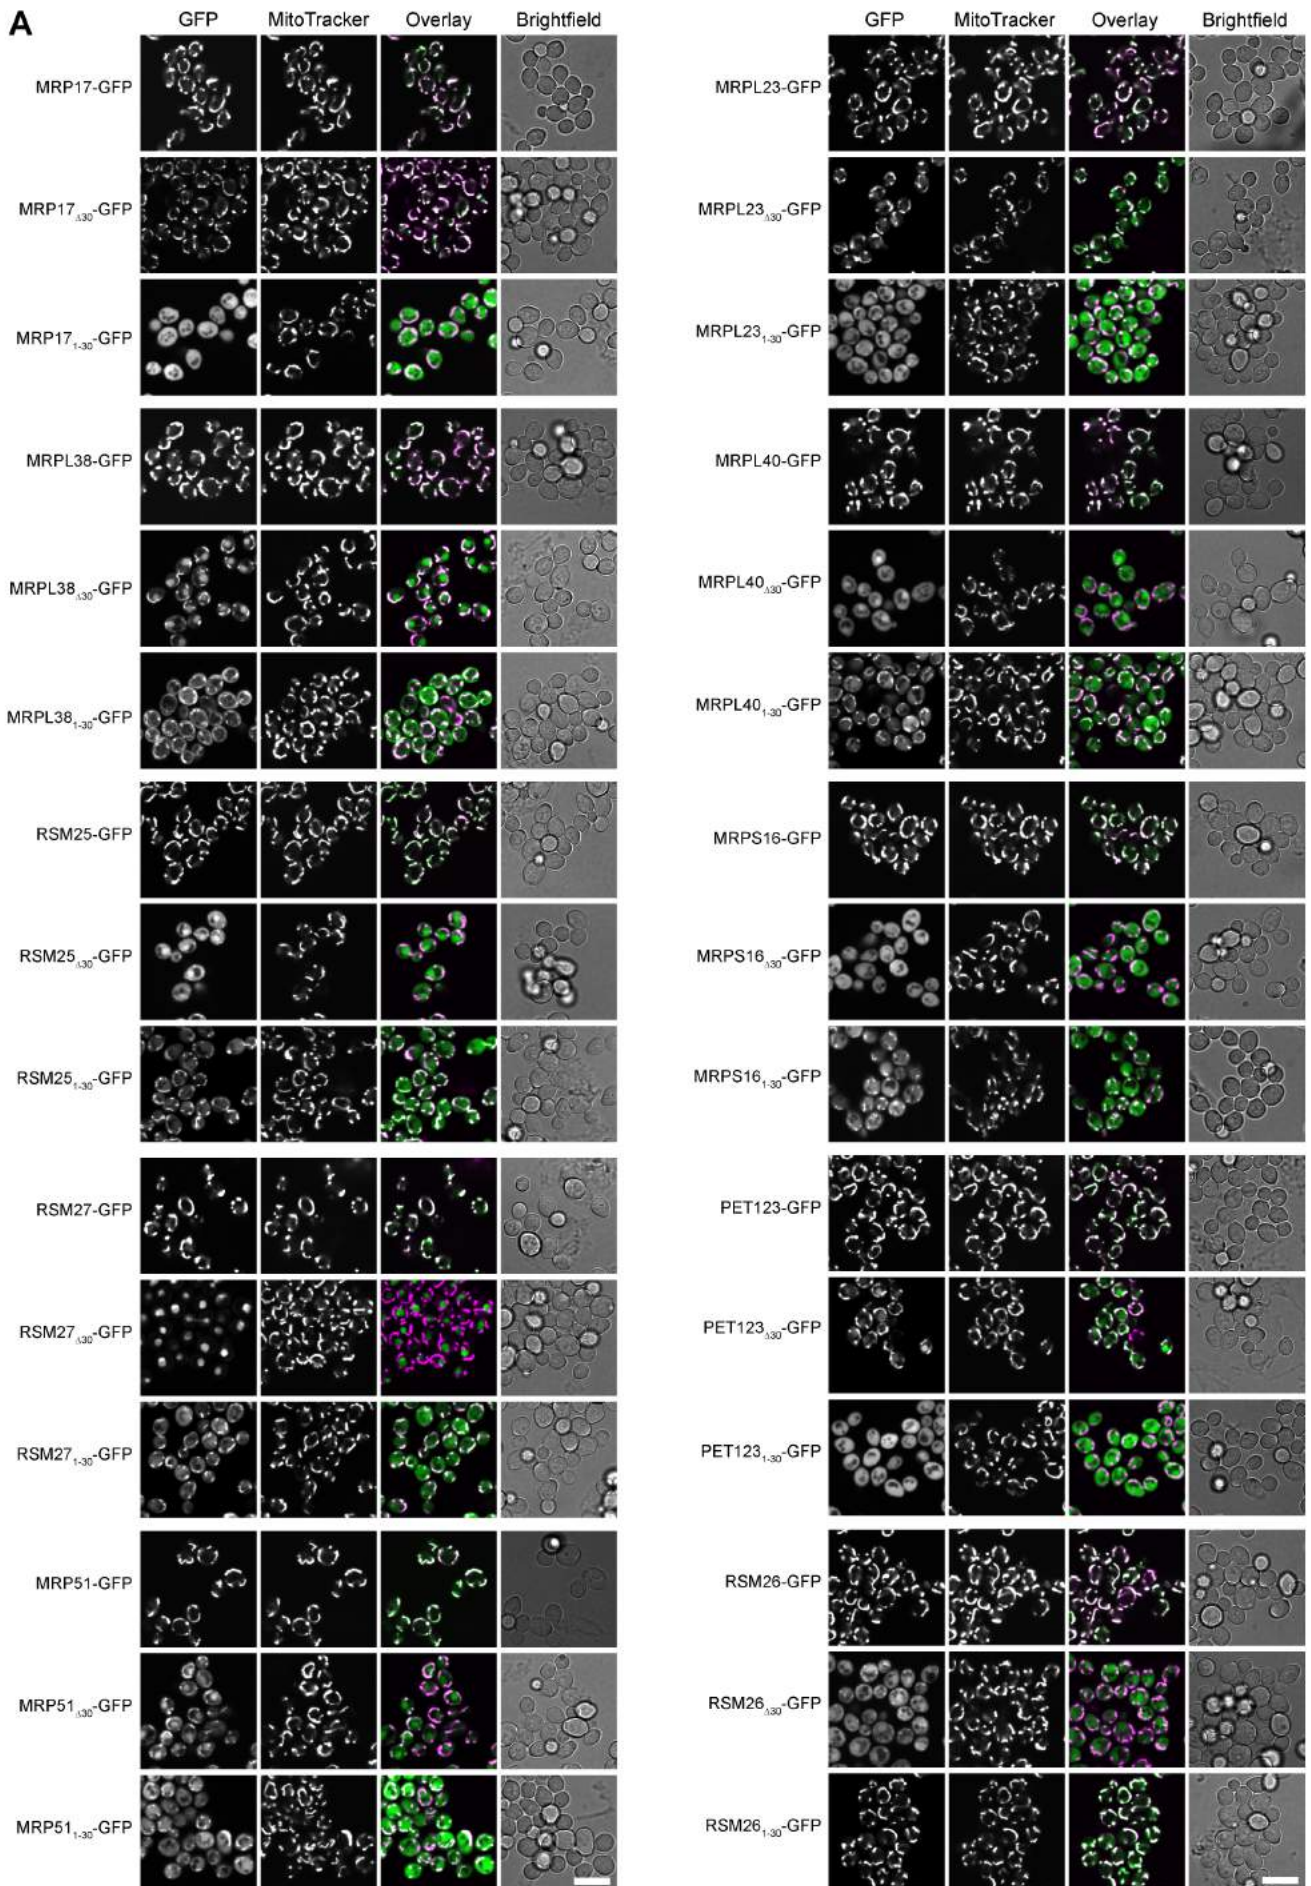

Fig. S4 - continues on the next page

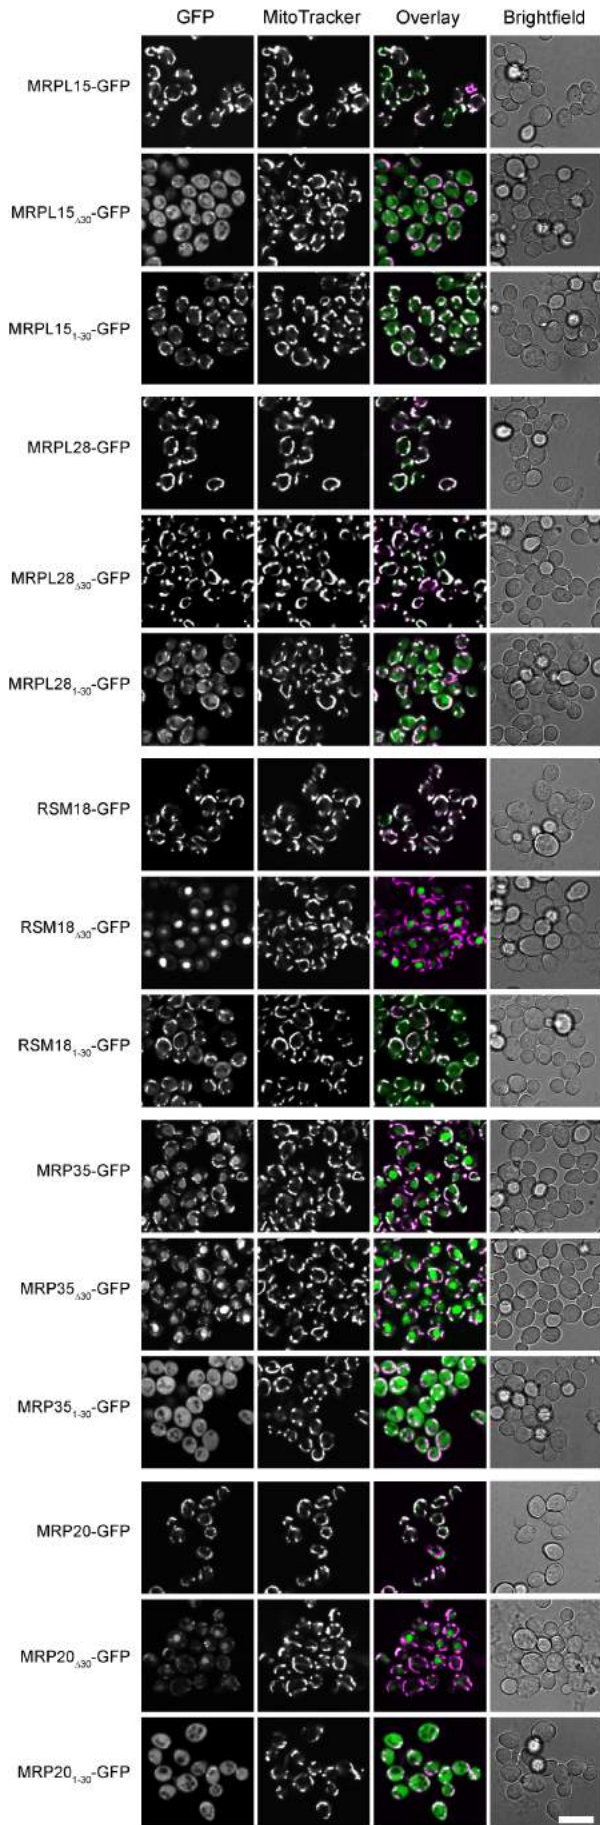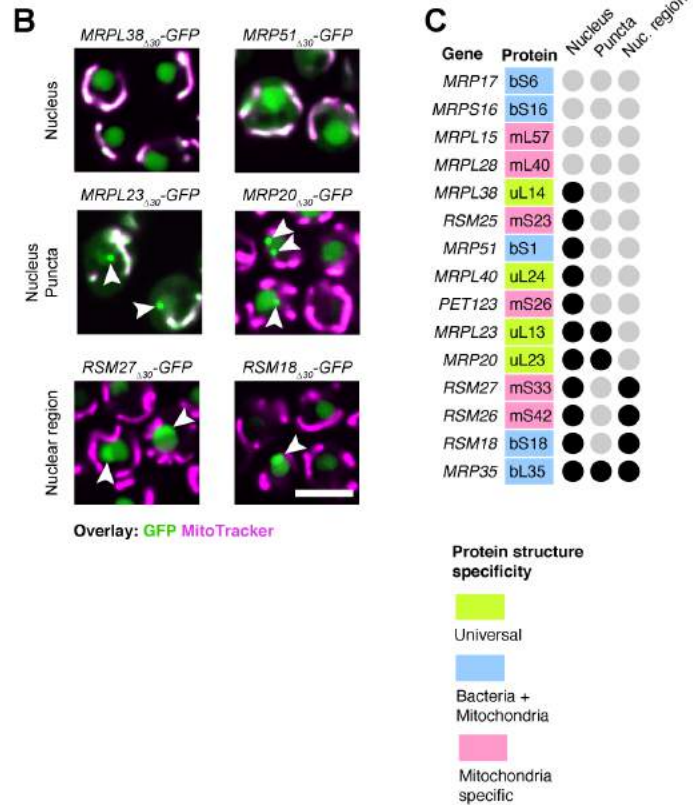

**Fig. S4. MRPs have N-termini with various targeting properties.** (A) Same micrographs as in Fig. 1C shown in different fluorescent channels for all the MRP. (B) Examples of mistargeting destinations of some MRPs with deleted 1-30 amino acids from their N-termini: top row – uniform nuclear signal, middle row – nuclear signal with bright perinuclear puncta, bottom row – nuclear signal with GFP enriched in non-punctate nuclear region, shown as enlarged overlays of GFP (green) and MitoTracker (magenta) channels cropped from micrographs in panel (A). (C) Summary of mistargeting locations for one or more truncations of each MRP, if the location is observed for any of the MRP truncation, it is marked with black circle. Scale bars are 10  $\mu$ m in (A) and 5  $\mu$ m in (B).



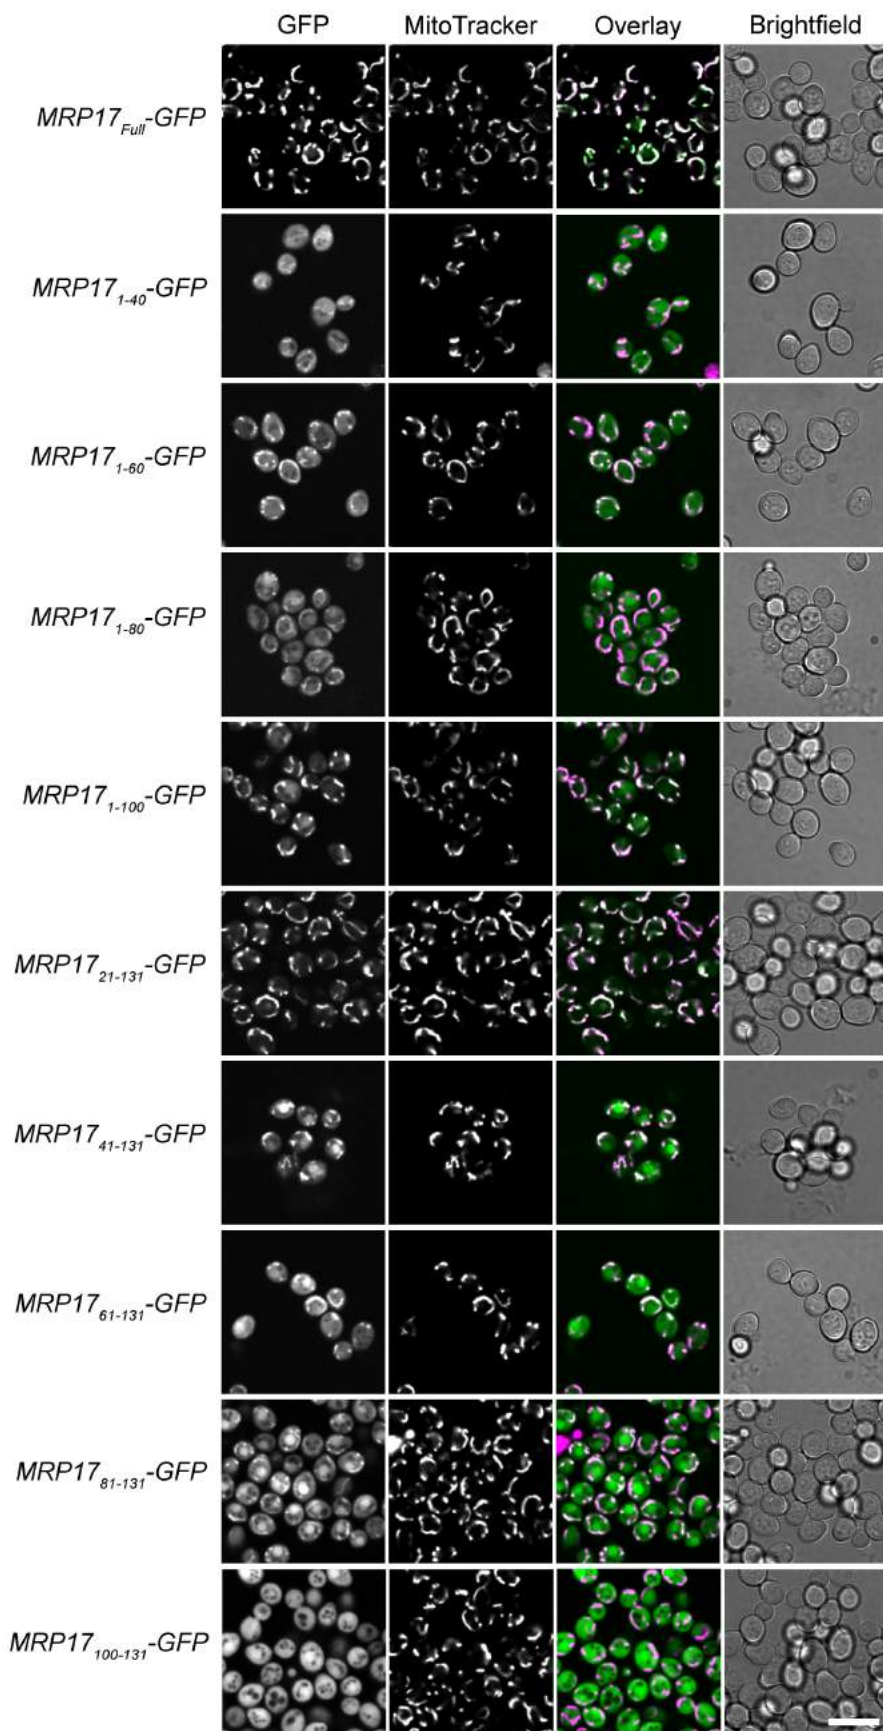

Fig. S6 - beginning, continues on the next page.

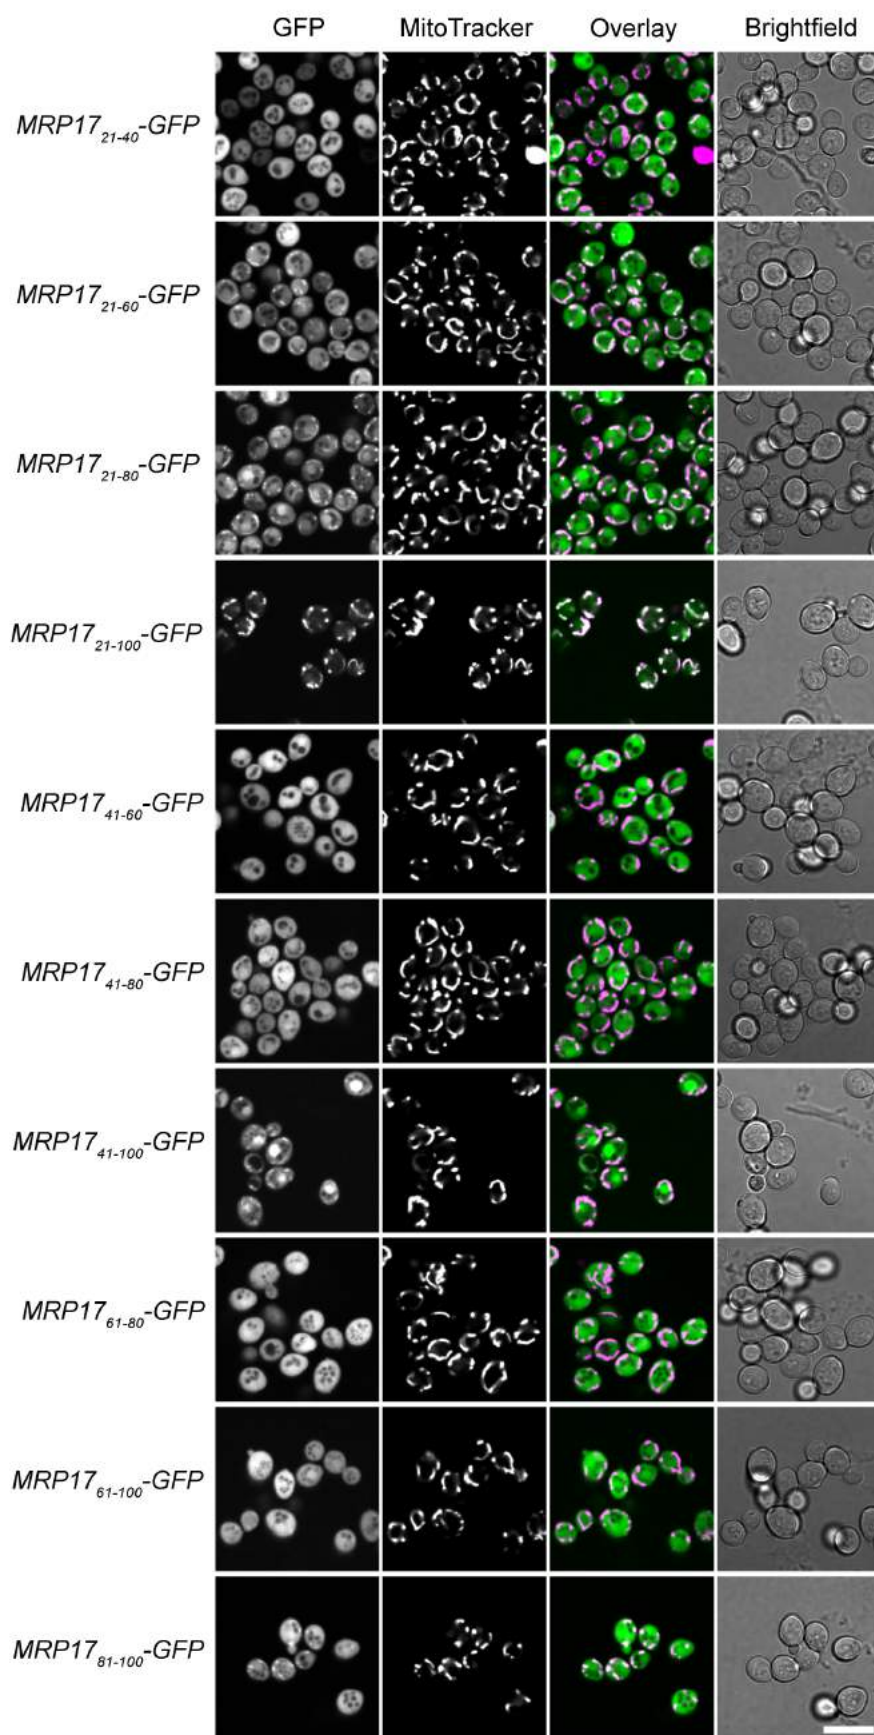

**Fig. S6. The ability of different Mrp17 truncations to target GFP to mitochondria.** Full sets of micrographs in different fluorescent channels for all the Mrp17 truncations including the ones shown in Fig. 2A. Scale bar 10  $\mu$ m.

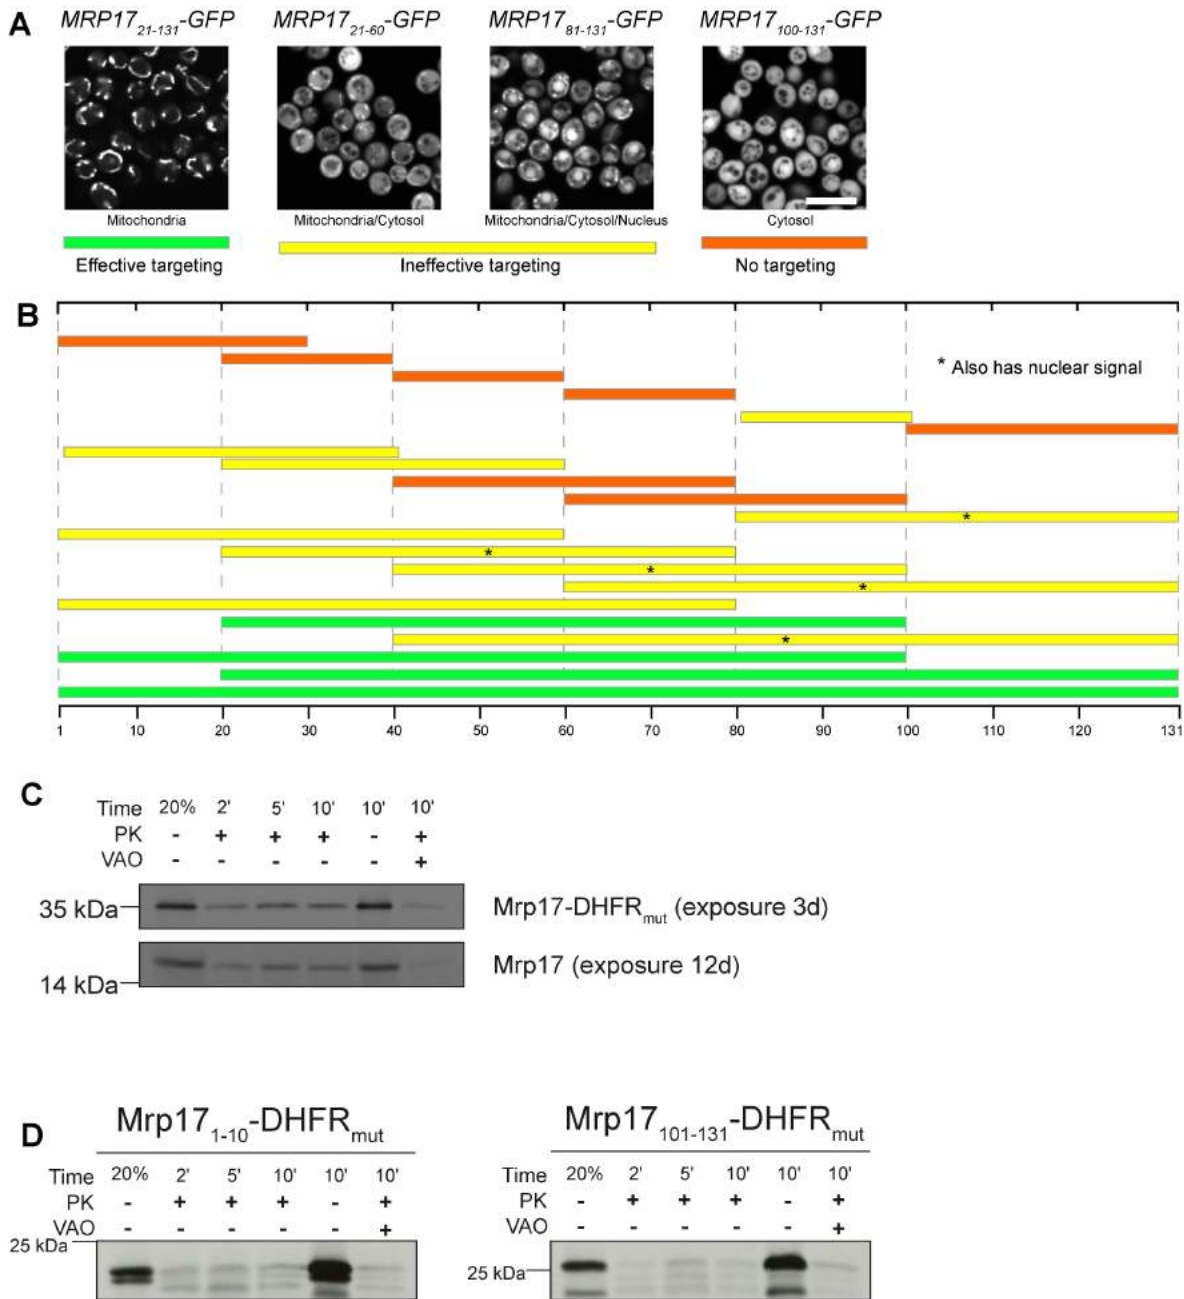

**Fig. S7. The non-canonical targeting and translocation signal of MRP17 is located between amino acids 30 and 60.** (A and B) In vivo characterization of mitochondrial targeting capacity of different MRP17 truncations fused to GFP: (A) GFP localization examples taken from Fig. S6 and demonstrating effective targeting with only mitochondrial GFP signal, ineffective targeting with mitochondrial GFP signal accompanied by strong cytosolic signal, ineffective targeting with additional nuclear signal, and no detectable mitochondrial targeting with exclusively cytosolic GFP. Scale bar is 10  $\mu$ m. (B) localization summary of different MRP17 truncations fused to GFP and colored according to the color-code for effective, ineffective, and no targeting introduced in panel (A), truncations additionally targeted to the nucleus are marked with asterisks. (C) MRP17-DHFR<sub>mut</sub> is translocated into isolated mitochondria at the same rate as WT MRP17 but gives better signal in the autoradiograph. (D) In vitro import assays for additional truncations of MRP17 fused to DHFR<sub>mut</sub> not shown in Fig. 2B, import was performed as described in the legend for Fig. 2.

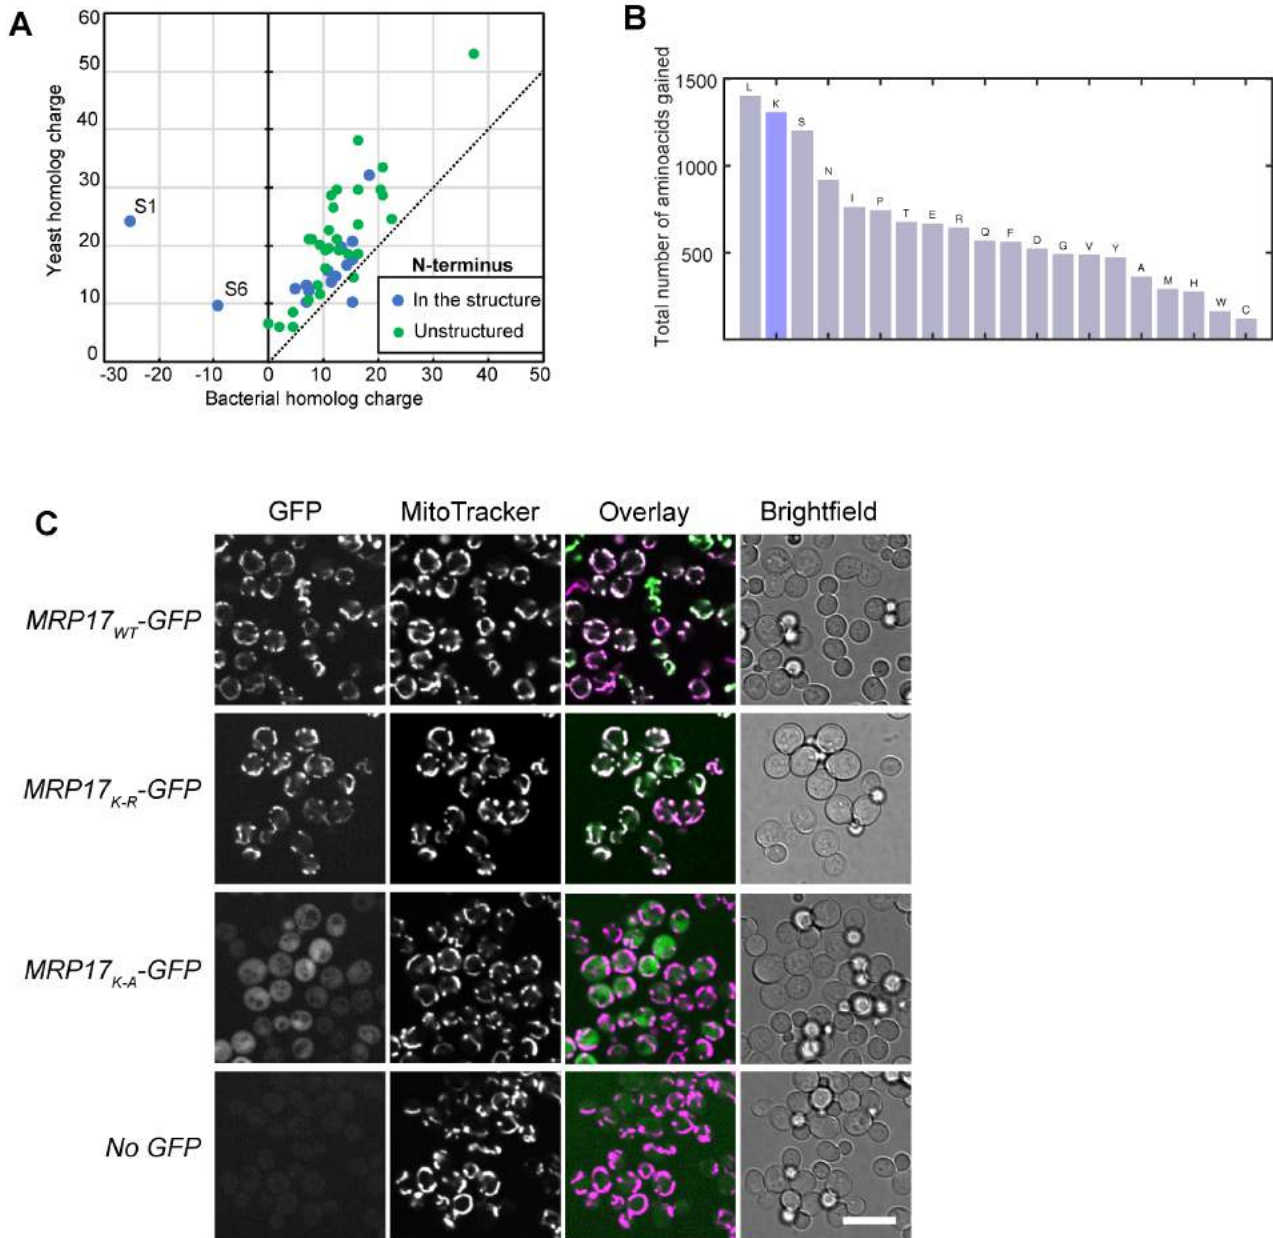

**Fig. S8. Mrp17 sequence features important for targeting and translocation to mitochondria.**

(A) Ribosomal proteins are positively charged and mitochondrial proteins acquired even more positive net charge compared to their bacterial homologs; (B) Total amino acid gain of MRPs (calculated as the difference between total count of each amino acid in all yeast MRPs, including mitochondria-specific, and all bacterial RPs) compared to bacterial RPs shows over-representation of lysines (K); (C) Lysines in Mrp17 are not important for mitochondrial targeting and can be substituted with arginines, same micrographs as in Fig. 3C shown in all channels beside micrographs of yeast not expressing any GFP (bottom row) as control for autofluorescence relative to cytosolic signal. All micrographs in the GFP channel are shown at the same contrast and brightness for comparison; Scale bar of all micrographs is 10  $\mu$ m.



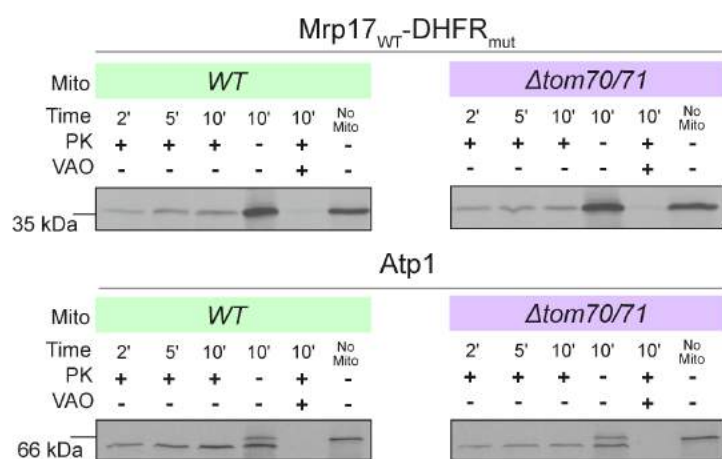

**Fig. S9. The translocation pathway of Mrp17 does not involve Tom70/71.** *In vitro* translocation of Mrp17-DHFR<sub>mut</sub> and control protein Atp1 into mitochondria isolated from WT and a  $\Delta tom70/71$  mutant showing no Tom70/71-dependence for Mrp17 translocation, import was performed as described in the legend for Fig.2.

### Structure conserved between bacterial RPs and yeast MRPs

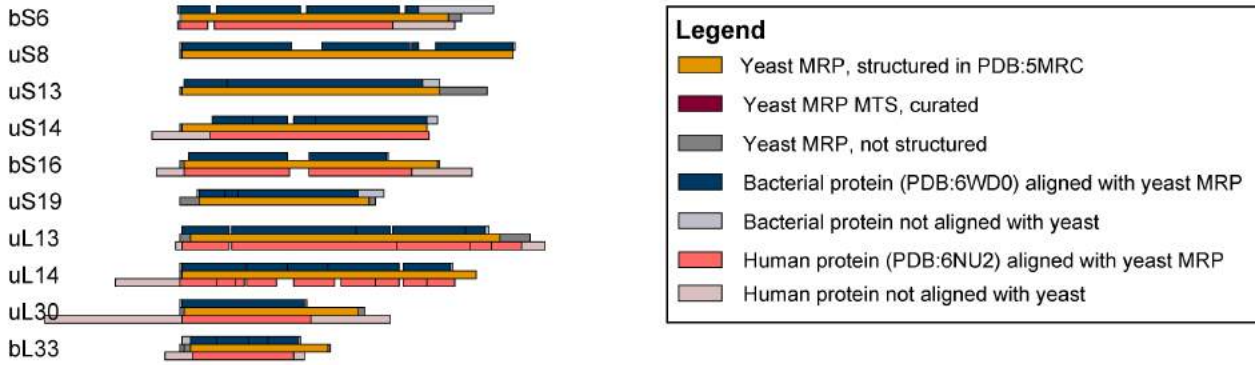

### Structure conserved between bacterial RPs and yeast MRPs, MTS added

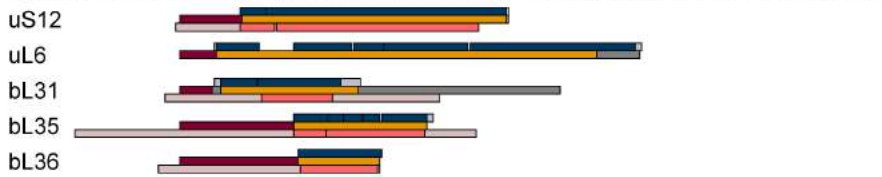

### Structure significantly expanded in MRPs

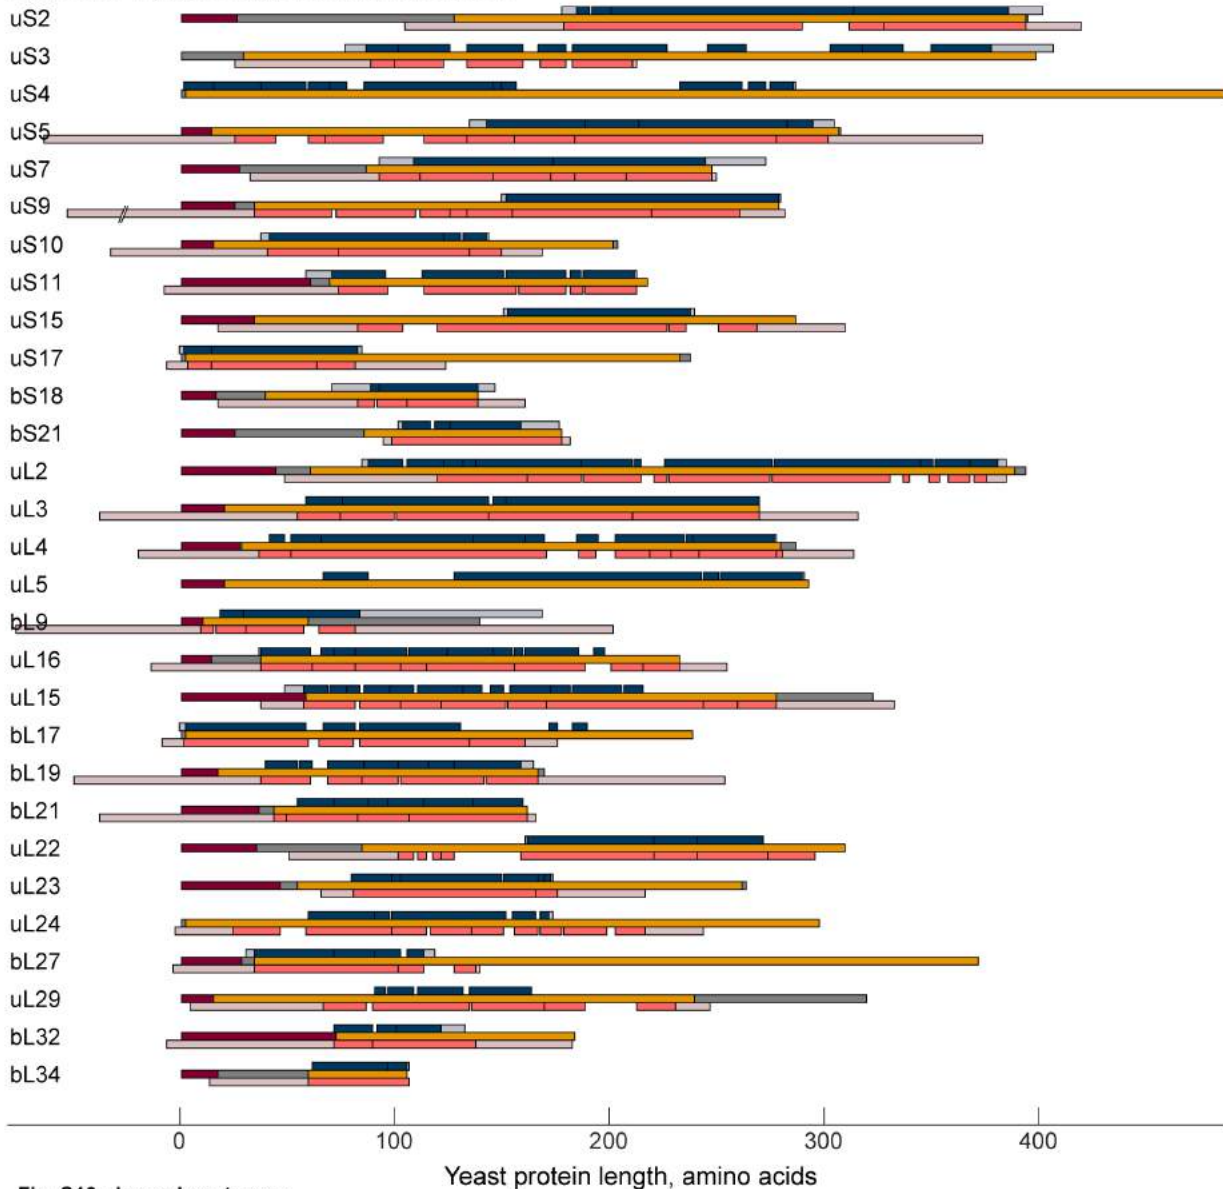

Fig. S10 - legend next page

**Fig. S10. Structural alignments of yeast and human MRPs and their bacterial homologs.** The structures of yeast MRPs that have bacterial homologs were aligned to their bacterial and human (when present) homologs using flexible structural alignment tool FATCAT (Li et al., 2020), and the resulting alignment was plotted relative to the length of yeast proteins, deletions in the yeast proteins relative to human and bacterial homologs are not plotted and the positions of corresponding insertions within human and bacterial sequences are indicated as solid black lines. MTS of yeast proteins were annotated according to Table S1. MPRs are grouped by structure conservation relative to bacterial homologs and then sorted by name.

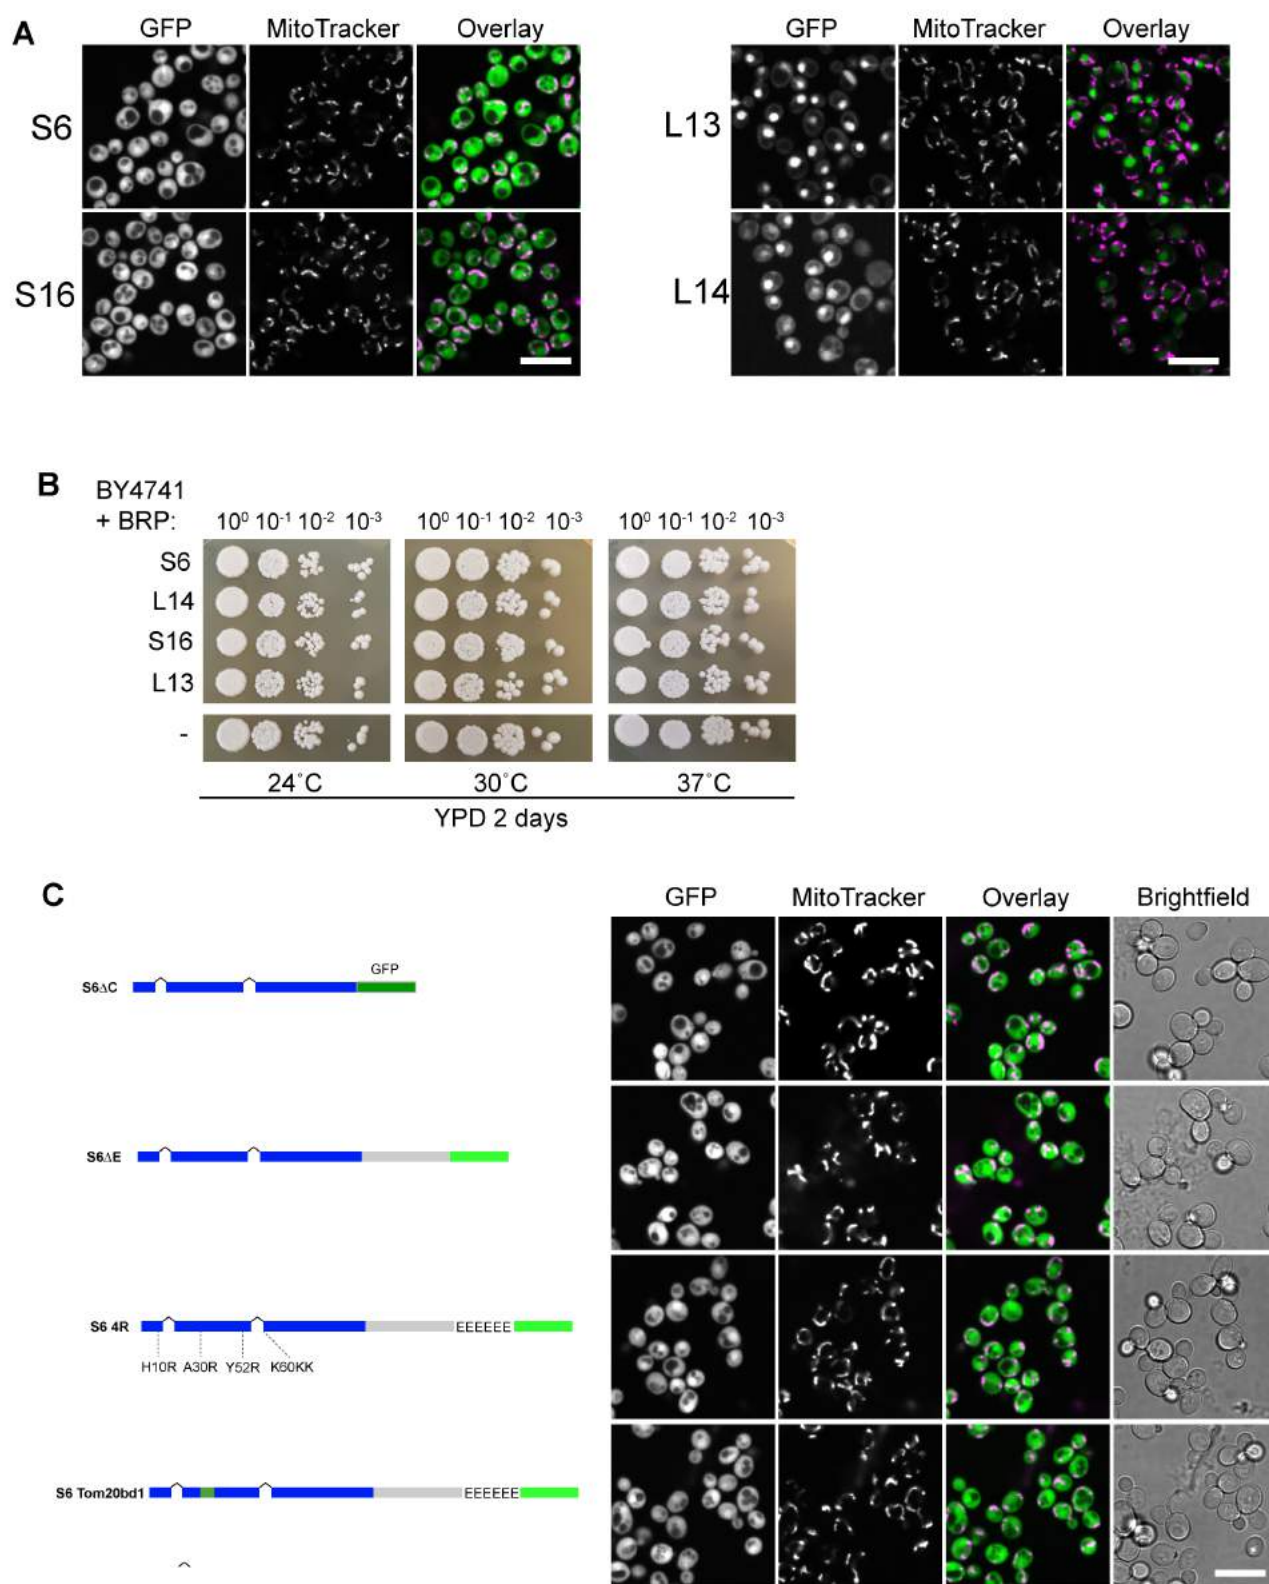

Fig. S11 - continues on the next page

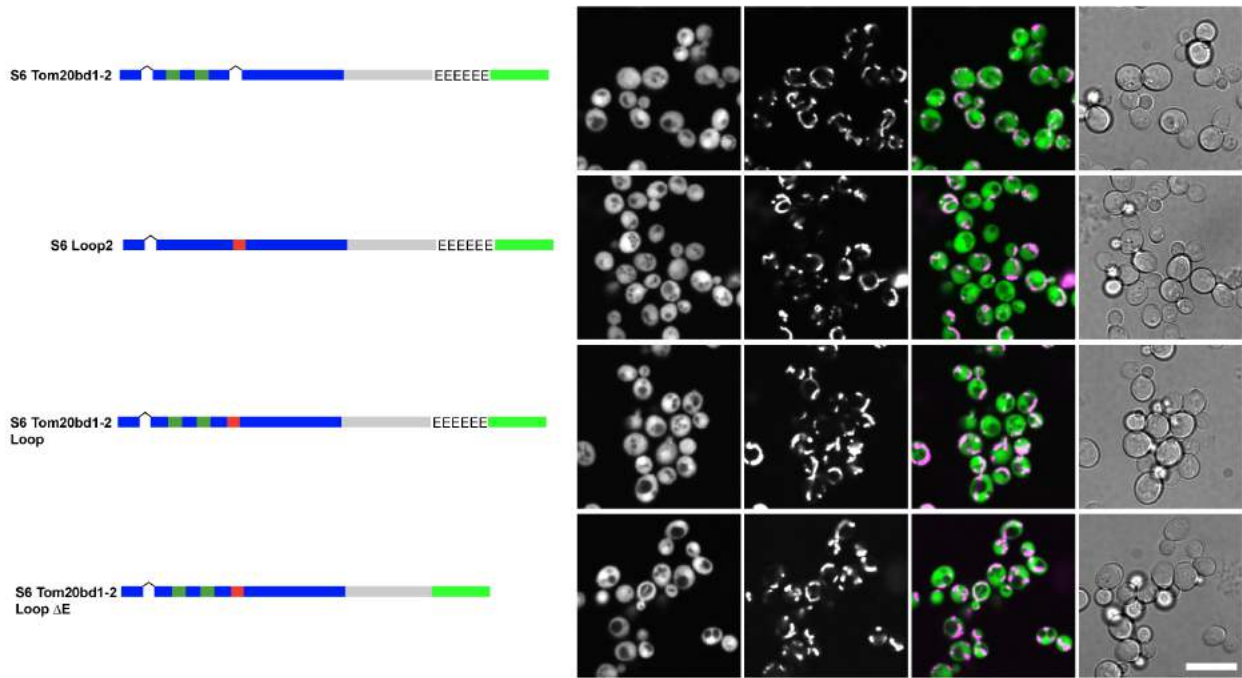

**Fig. S11. Comparison of Mrp17 and its bacterial homolog EcS6 in the structural context.** (A) Expression of bacterial homologs of MRPs in yeast, same micrographs as in Fig. 5C shown in all channels. (B) Drop dilution growth assay for all the strains from panel A and WT control performed on rich fermentative media at different temperatures. (C) Schematic representations of chimeric constructs incorporating Mrp17 features into EcS6 (corresponds to schematic on Fig. 5D, top) and fluorescence micrographs of yeast expressing each respective construct. Scale bar in all panels is 10  $\mu$ m.

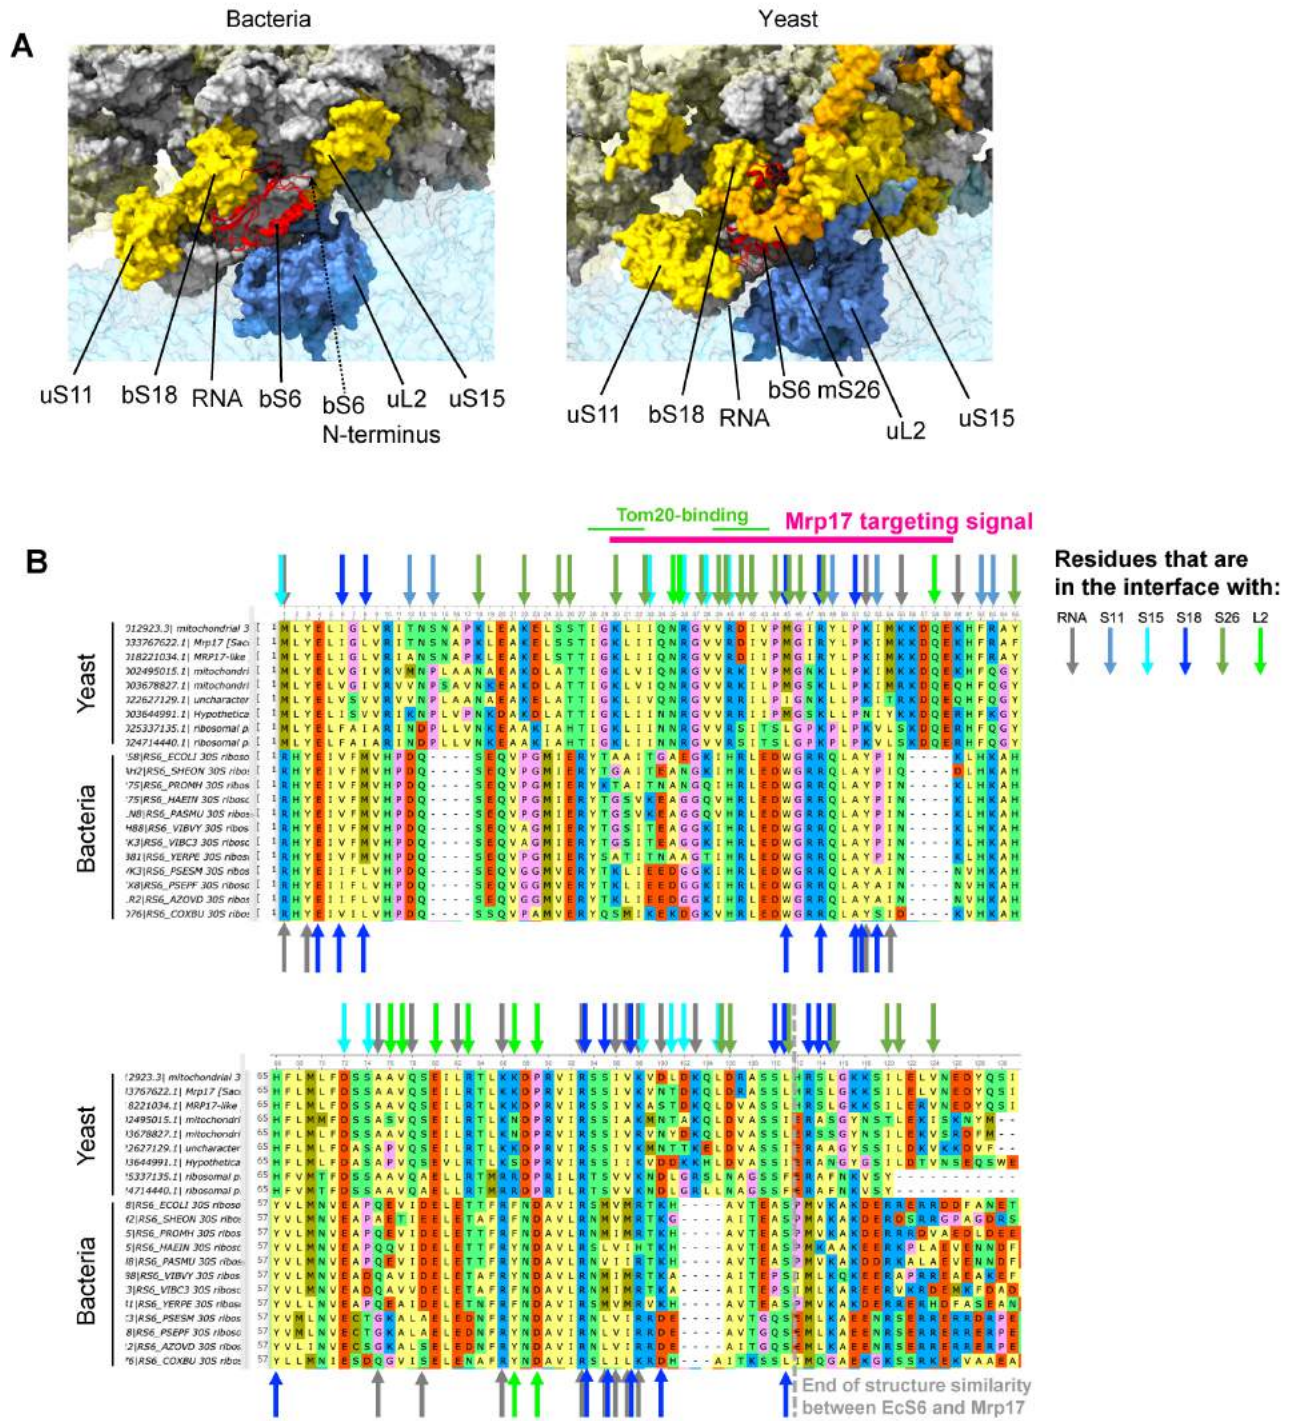

**Fig. S12. Mrp17 and EcS6 in the context of ribosome structures.** (A) A comparison of the structural environment of the S6 protein in bacterial ribosome (PDB:6WD0, left) and yeast mitoribosome (PDB:5MRC, right). RNA is shown in grey, small subunit (SSU) proteins in yellow (highlighted are solid and others are transparent), S6 is red, all large subunit (LSU) components are in blue (highlighted are solid and others are transparent), mitochondria-specific protein mS26 is in orange. (B) Structural alignment of Mrp17 (first sequence) and its yeast homologs with EcS6 (first out of bacterial) and its bacterial homologs highlighting involvement of each amino acid in protein-protein and protein-RNA interfaces (arrows, see legend on the figure) in yeast mitoribosome (on top) and bacterial ribosome (in the bottom), amino acids are numbered relative to Mrp17, thus the N-terminal Met in bacterial proteins is not shown.
